# Supplementary material for: Machine-learning algorithms for identifying climate-resilient corals in the Republic of Palau
Source: Research Square preprint supplement (doi:10.21203/rs.3.rs-6162052/v1), 2025-04-22
Supplement: Supplementary file 6 [file Mayfield & Dempsey Appendix C-online supplemental data file.xlsx]

## Sheet: manuscript data
														SA=surface area																						Sym=Symbiodiniaceae	Biological composition parameters			Symbiodiniaceae genus-typying			RNA spike control	normalized gene expression data
sample	site code	site name	necrosis score	standardized(necrosis score)	(-)stnd(Sym GCP)	Sym health score (high score=bad)	biopsy phenotype	biopsy phenotype-scores	colony phenotype (1-5)	% of colony bleached/dead-binned	% of colony bleached/dead	Sym assemblage	max length (cm)	planar SA (cm2)	polyps extended	polyps extended (continuous)	latitude	longitude	lagoon	reef emergence	island	exposure	reef location	forereef?	reef type	collection date	time-binned	night-day	temperature (C)	salinity	PAR	depth (m)	depth (binned)	site description	RNA/DNA	Sym GCP *10^9 (raw)	Sym GCP (%)	host GCP (%)	host GCP *10^9 (raw)	Cladocopium *10^9	Symbiodinium *10^9	Durusdinium *10^9	Solaris spike x10^9	normalized host cu-zn-sod	normalized host gfp-cp	normalized Sym ubiq-lig	normalized Sym hsp90	normalized host cytochrome p450	normalized Sym katG
PaPd18.3 (night)	PA11	PaUl11-night	0	-0.25	0.58	0.16	healthy	5	4	0	0	D w/residual A+C					7.2962	134.258	inside	emergent	Koror	protected	back reef	no	patch reef	2015-01-13	night	night			0	9	5 — 10	Ulong back reef	0.47	2.46	0.08	99.92	2958.57	0.07	3.48	614.82	13.59	0.18	0.07		0.22	0.01	0.01
PaPd19-day	PA11	PaUl11-day	3.25	2.4	0.6	1.5	bleached	1	2	40-80	50	D w/residual A+C	15	79	yes	2	7.2962	134.258	inside	emergent	Koror	protected	back reef	no	patch reef	2015-01-13	midday	day	28.5	33.8	32	9.2	5 — 10	Ulong back reef	2.73	1.86	0.04	99.96	4806.22	1.82	3.64	849.63	0.12	0.06	0.28		1.28	0.01	7.59
PaPd19.3 (night)	PA11	PaUl11-night	3.25	2.4	0.58	1.49	bleached	1	2	40-80	50	D w/residual A+C	15	79			7.2962	134.258	inside	emergent	Koror	protected	back reef	no	patch reef	2015-01-13	night	night			0	9.2	5 — 10	Ulong back reef	1.28	2.7	0.1	99.9	2760.45	0.16	3.81	889.81	13.28	0.27	0.07	0.02	2.08	0.03	0.02
PaPd20.1-2	PA11	PaUl11-day	0	-0.25	0.57	0.16	pale	4	4	0	0	D w/residual A+C	11	79	yes	2	7.2962	134.258	inside	emergent	Koror	protected	back reef	no	patch reef	2015-01-13	midday	day	28.5	33.8	28	9.7	5 — 10	Ulong back reef	0.7	1.17	0.14	99.86	849.63	0.07	6.27	329.47	8.17	0.97	1.19	0.03	8.33	0.21	0.02
PaPd20.3 (night)	PA11	PaUl11-night	0	-0.25	0.57	0.16	pale	4	4	0	0	D w/residual A+C	11	79			7.2962	134.258	inside	emergent	Koror	protected	back reef	no	patch reef	2015-01-13	night	night			0	9.7	5 — 10	Ulong back reef	0.68	2.04	0.12	99.88	1699.25	0.08	1.74	293.53	6.95	0.39	5.62	0.1	6.17	0.74	0.49
PaPd21.1-2	PA11	PaUl11-day	0	-0.25	0.59	0.17	healthy	5	5	0	0	D w/residual A+C	27	220	yes	2	7.2962	134.258	inside	emergent	Koror	protected	back reef	no	patch reef	2015-01-13	midday	day	28.5	33.8	28	10.1	10 — 15	Ulong back reef	1.93	1.7	0.05	99.95	3727.57	0.13	3.4	1317.89	0.15		0.05	10.24		0.01	1.11
PaPd21.3 (night)	PA11	PaUl11-night	0	-0.25	0.58	0.16	healthy	5	5	0	0	D w/residual A+C	27	220			7.2962	134.258	inside	emergent	Koror	protected	back reef	no	patch reef	2015-01-13	night	night			0	10.1	10 — 15	Ulong back reef	1.16	2.35	0.08	99.92	2958.57	0.4	3.03	1779.62	5.27	0.91	1.31	0.03	15.9	0.41	0.37
PaPd22.1-2	PA11	PaUl11-day	0	-0.25	0.6	0.17	pale	4	3	0	0	D w/residual A+C	27	328	yes	2	7.2962	134.258	inside	emergent	Koror	protected	back reef	no	patch reef	2015-01-13	midday	day	28.5	33.8	42	9.7	5 — 10	Ulong back reef	0.69	0.21	0.02	99.98	849.63	0.1	1.58	80.49	6.64	1.47	7.94	0.04	4.56	0.14	0.22
PaPd23-day	PA11	PaUl11-day	0	-0.25	0.59	0.17	healthy	5	5	0	0	D w/residual A+C	21	221	yes	2	7.2962	134.258	inside	emergent	Koror	protected	back reef	no	patch reef	2015-01-13	midday	day	28.5	33.8	42	10.1	10 — 15	Ulong back reef	0.9	2.14	0.06	99.94	3477.95	0.07	2.19	267.62	7.8	0.95	7.58	0.01	7.77	0.2	0.4
PaPd23.3 (night)	PA11	PaUl11-night	0	-0.25	0.58	0.16	healthy	5	5	0	0	D w/residual A+C	21	221			7.2962	134.258	inside	emergent	Koror	protected	back reef	no	patch reef	2015-01-13	night	night			0	10.1	10 — 15	Ulong back reef	0.51	1.82	0.11	99.89	1699.25	0.1	0.74	792.73	4.92	0.67	0.12	0.12	7.95	0.2	0.02
PaPd24-day	PA11	PaUl11-day	0	-0.25	0.6	0.17	healthy	5	5	0	0	D w/residual A+C			yes	2	7.2962	134.258	inside	emergent	Koror	protected	back reef	no	patch reef	2015-01-13	midday	day	28.5	33.8	37	10	10 — 15	Ulong back reef	0.37	1.82	0.04	99.96	5151.18	0.26	4.18	2575.59	0.05	0.08	0.41		5.75	0.01	51.03
PaPd24.3 (night)	PA11	PaUl11-night	0	-0.25	0.59	0.17	healthy	5	5	0	0	D w/residual A+C					7.2962	134.258	inside	emergent	Koror	protected	back reef	no	patch reef	2015-01-13	night	night			0	10	10 — 15	Ulong back reef	0.48	1.38	0.05	99.95	2760.45	0.12	3.4	975.97	7.62	0.2	0.58	0.36	17.03	0.1	0.41
PaPd25.1-2	PA11	PaUl11-day	0	-0.25	0.6	0.17	pale	4	4	0	0	D w/residual A+C	19	185	yes	2	7.2962	134.258	inside	emergent	Koror	protected	back reef	no	patch reef	2015-01-13	midday	day	28.5	33.8	32	10.5	10 — 15	Ulong back reef	1.72	0.59	0.03	99.97	1863.78	0.15	2.7	184.91	0.04	2.33	2.03	7.16	5.24	0.4	35.26
PaPd27	PA14	PaUl14	0	-0.25	-1.31	-0.78	healthy	5	5	0	0	C w/residual A	13	84	yes	2	7.2505	134.239	outside	emergent	Koror	exposed	fore reef	yes	barrier reef	2015-01-14	midday	day	28.4	33.9	55	26.4	25 — 30	Ulong forereef	0.46	255.53	6.42	93.58	3727.57	14910.3	4.28	0.01	16.34	0.18	1.94	0.13	1.5	0.05	9.75
PaPd28	PA14	PaUl14	1.75	-0.25	-0.22	-0.23	pale	4	4	0-40	7.5	C w/residual A	10	31	no	0	7.2505	134.239	outside	emergent	Koror	exposed	fore reef	yes	barrier reef	2015-01-14	midday	day	28.4	33.9	60	20	20 — 25	Ulong forereef	0.38	84.29	2.77	97.23	2958.57	6641.77	2.24	0.04	5.91	1.22	8.33	0.61	10.78	0.32	28.44
PaPd29	PA16	PaUl16	0	-0.25	0.59	0.17	pale	4	4	0	0	D w/residual A+C	18	100	yes	2	7.2836	134.245	outside	emergent	Koror	intermediate	fore reef	yes	fringing reef	2015-01-15	morning	day	28.5	33.9	19	24	20 — 25	Ulong channel	1.67	0.5	0.06	99.94	811.26	0.06	4.59	361.37	17.52	0.04	0.02		0.01	0	0.01
PaPd30	PA16	PaUl16	0	-0.25	0.52	0.13	healthy	5	5	0	0	D w/residual A+C	13	88	yes	2	7.2836	134.245	outside	emergent	Koror	intermediate	fore reef	yes	fringing reef	2015-01-15	morning	day	28.5	33.9	37	20	20 — 25	Ulong channel	1.07	4.48	0.29	99.71	1549.25	0.28	2.57	249.69	0.02	0.57	1.47		1.23	0.32	4.57
PaPd31	PA16	PaUl16	3.25	2.4	-0.22	1.09	bleached	1	2	40-80	60	C w/ residual A+D	12.5	72	some	1	7.2836	134.245	outside	emergent	Koror	intermediate	fore reef	yes	fringing reef	2015-01-15	morning	day	28.5	33.9		15.5	15 — 20	Ulong channel	0.68	54.34	2.77	97.23	1907.35	629.19	4.28	0.87	5.03	0.72	1.12	0.83	2.89	0.12	11.82
PaPd32	PA17	PaUl17	0	-0.25	-0.83	-0.54	fluorescent	3.5	5	0	0	C w/residual A	13	90	yes	2	7.2659	134.246	outside	emergent	Koror	intermediate	fore reef	yes	fringing reef	2015-01-15	midday	day	26.9	34.2	179	10.7	10 — 15	South of Ulong channel	1.98	96.83	4.83	95.17	1907.35	3320.89	1.19	0.01	11.56	0.81	54.18	0.03	1.51	0.34	3.31
PaPd33	PA17	PaUl17	0	-0.25	0.59	0.17	healthy	5	5	0	0	D w/residual A+C	9	42	no	0	7.2659	134.246	outside	emergent	Koror	intermediate	fore reef	yes	fringing reef	2015-01-15	midday	day	26.9	34.2	335	6.5	5 — 10	South of Ulong channel	3.83	1.41	0.05	99.95	2824.97	0.28	3.17	153.7	17.52	0.2	0.02	0.03	0.05	0.01	0.03
PaPd34	PA18	PaPl18	0	-0.25	-0.93	-0.59	healthy	5	5	0	0	C w/ residual A+D	7	29	yes	2	7.0626	134.249	outside	emergent	Peleliu	intermediate	fore reef	yes	fringing reef	2015-01-16	morning	day	28.6	34	42	25	25 — 30	Olngenaol	0.46	101.41	5.16	94.84	1863.78	7118.48	3.99	133.81	3.4	1.07	8.34	0.12	4.81	0.22	12.4
PaPd35.2	PA18	PaPl18	0	-0.25	0.59	0.17	pale	4	4	0	0	D w/residual A+C	29	334	yes	2	7.0626	134.249	outside	emergent	Peleliu	intermediate	fore reef	yes	fringing reef	2015-01-24	midday	day	28.6	34	124	9.5	5 — 10	Back reef near Aiwakoko channel	0.66	2.24	0.07	99.93	3320.89	0.36	2.82	2092.03	13.28	0.03	0.06	0.07	0.06	0.01	0.02
PaPd37.2	PA19	PaPl19	0	-0.25	0.58	0.16	healthy	5	5	0	0	D w/residual A+C	8	35			7.0827	134.262	outside	emergent	Peleliu	intermediate	fore reef	yes	fringing reef	2015-01-16	midday	day	28.6	34	184	14.5	10 — 15	South of German Channel	0.58	3.4	0.1	99.9	3320.89	5.39	2.89	511.06	2.57	0.99	7.94	0.31	20.98	0.74	4.07
PaPd38	PA22	PaPl22	0	-0.25	-1.19	-0.72	healthy	5	5	0	0	C w/residual A	15	91	yes	2	7.1722	134.22	outside	emergent	Koror	exposed	fore reef	yes	barrier reef	2015-01-17	midday	day	27.6	34.2	28	29.7	25 — 30	Desomel	0.88	58.24	6.01	93.99	910.61	2190.97	4.18		8.96	0.67	2.73	0	0.7	0.02	0.21
PaPd39	PA22	PaPl22	0	-0.25	-1.31	-0.78	healthy	5	5	0	0	C w/residual A			yes	2	7.1722	134.22	outside	emergent	Koror	exposed	fore reef	yes	barrier reef	2015-01-17	midday	day	27.6	34.2	69	25.5	25 — 30	Desomel	1.25	133.81	6.42	93.58	1951.93	6055.45	3.99	0	8.76	1.41	4.68	0.02	1.4	0.14	0.45
PaPd40	PA22	PaPl22	1.75	-0.25	-0.57	-0.41	pale	4	4	0-40	10	C w/residual A	4	9	yes	2	7.1722	134.22	outside	emergent	Koror	exposed	fore reef	yes	barrier reef	2015-01-17	midday	day	27.6	34.2	124	19.8	15 — 20	Desomel	0.55	63.88	3.96	96.04	1549.25	2760.45	3.24		11.29	0	0.01	0	0	0.01	0
PaPd41	PA23	PaCg23	0	-0.25	-1.67	-0.96	healthy	5	5	0	0	C w/residual A	12	72	yes	2	7.11814	134.271	outside	emergent	Koror	exposed	fore reef	yes	patch reef	2015-01-17	afternoon	day	28.8	33.9	19	30	≥ 30	Coral Gardens	0.64	255.53	7.62	92.38	3098.5	7118.48	5.09	0.05	12.1	0.26	0.13	0.63	3.92	0.12	27.29
PaPd43	PA23	PaCg23	0	-0.25	-0.55	-0.4	healthy	5	5	0	0	C w/residual A	14	69	yes	2	7.11814	134.271	outside	emergent	Koror	exposed	fore reef	yes	patch reef	2015-01-17	afternoon	day	28.8	33.9	51	15	15 — 20	Coral Gardens	0.33	160.97	3.87	96.13	3995.11	4806.22	1.51	0.01	10.54	0.39	11.24	0.19	3.51	0.35	8.45
PaPd44	PA24	PaAn24	1.75	-0.25	0.32	0.03	pale	4	3	0-40	20	C w/residual A	8	26	some	1	6.92113	134.123	outside	emergent	Angaur	intermediate	fore reef	yes	fringing reef	2015-01-18	morning	day	28.5	34.1	46	30.3	≥ 30	Santa Maria Corner	0.97	10.78	0.97	99.03	1095.48	378.47	1.86	0	9.83	0.39	0.2	0.01	0.09	0.03	0.02
PaPd44.2	PA24	PaAn24	0	-0.25	0.22	-0.02	pale	4	3	0	0	C w/residual A			some	1	6.92113	134.123	outside	emergent	Angaur	intermediate	fore reef	yes	fringing reef	2015-01-18	morning	day	28.5	34.1	46	30.3	≥ 30	Santa Maria Corner	0.66	27.17	1.31	98.69	2044.25	849.63	3.32	0.01	7.99	0.43	0.7	0.44	2.53	0.09	9.24
PaPd45.2	PA24	PaAn24	0	-0.25	0.58	0.16	fluorescent	3.5	3	0	0	D w/residual A+C			yes	2	6.92113	134.123	outside	emergent	Angaur	intermediate	fore reef	yes	fringing reef	2015-01-18	morning	day	27.9	34.3	28	25.2	25 — 30	Santa Maria Corner	0	1.91	0.08	99.92	2242.18	0.19	3.24	643.9	12.68	0.01	0.23		0.01	0.07	0.01
PaPd47	PA27	PaCp27	0	-0.25	-0.68	-0.47	healthy	5	5	0	0	C w/residual A	19	165	yes	2	7.41292	134.337	outside	emergent	Koror	intermediate	fore reef	yes	barrier reef	2015-01-19	morning	day	26.4	34.2	51	26	25 — 30	Crocodile Point	3.31	300.39	4.33	95.67	6641.77	12394	3.24	0.01	11.04	1.37	3.23	0.09	1.77	0.16	0.6
PaPd48	PA29	PaWp29	0	-0.25	0.06	-0.1	healthy	5	5	0	0	D w/residual A+C	11	44	yes	2	7.54777	134.459	outside	emergent	Ngaremlengui	intermediate	fore reef	yes	barrier reef	2015-01-19	afternoon	day	28.6	34	74	17.4	15 — 20	Western Passage	0.76	47.31	1.85	98.15	2516.76	2348.22	3.6	476.84	0.05		0.22	1.25	0.99	0.29	5.46
PaPd49	PA30	PaBb30	1.75	-0.25	-0.63	-0.44	bleached	1	3	0-40	20	C w/residual A	8	33	yes	2	7.5988	134.48	outside	emergent	Ngardmau	exposed	fore reef	yes	barrier reef	2015-01-20	morning	day	28.1	34	19	30.6	≥ 30	Babeltheop	2.31	133.81	4.14	95.86	3098.5	3559.24	0.57	0.02	7.8	1.31	3.46	0.04	0.99	0.27	2.86
PaPd50	PA32	PaBb32	1.75	-0.25	-1.27	-0.76	healthy	5	4	0-40	10	C w/ residual A+D	13	95	yes	2	7.4967	134.383	outside	emergent	Aimeliik	intermediate	fore reef	yes	barrier reef	2015-01-20	afternoon	day	28.8	33.9	28	29.6	25 — 30	Babeltheop	0.92	127.77	6.28	93.72	1907.35	3995.11	4.59	103.78	12.39	0.24	0.14	0	0.21	0.01	0.58
PaPd51	PA32	PaBb32	0	-0.25	-0.04	-0.15	healthy	5	5	0	0	C w/residual A	10	53	yes	2	7.4967	134.383	outside	emergent	Aimeliik	intermediate	fore reef	yes	barrier reef	2015-01-20	afternoon	day	28.8	33.9	28	29.9	25 — 30	Babeltheop	1.15	66.9	2.16	97.84	3027.73	7284.86	4.13	0.01	1.32	1.51	15.53	0.97	23.5	0.25	87.69
PaPd52-tumor	PA33	PaAw33	0	-0.25	0.06	-0.1	sick	1	2	0	0	C w/residual A	19	128	yes	2	7.6323	134.521	outside	emergent	Ngardmau	exposed	fore reef	yes	patch reef	2015-01-21	morning	day	28.6	34	32	14.6	10 — 15	N of western passage	4.08	143.41	1.85	98.15	7629.39	7990.22	6.05	0.01	2.82	1.73	6.6	0.36	7.55	0.25	20.39
PaPd53-day	PA31	PaBb31-dive 3 (day)	0	-0.25	0.59	0.17	healthy	5	5	0	0	D w/residual A+C	19	221	yes	2	7.54509	134.488	inside	submerged	Ngaremlengui	protected	lagoonal	no	patch reef	2015-01-21	midday	day	28.9	33.6	110	11	10 — 15	Babeltheop	0.36	1.29	0.07	99.93	1863.78	0.09	1.26	560.54	1.91	7.58	42.9	0.03	12.62	1.5	6.92
PaPd54.1-2	PA31	PaBb31-dive 3 (day)	0	-0.25	-1.82	-1.04	fluorescent	3.5	5	0	0	C w/residual A			yes	2	7.54509	134.488	inside	submerged	Ngaremlengui	protected	lagoonal	no	patch reef	2015-01-21	midday	day	28.9	33.6	119	10.9	10 — 15	Babeltheop	1.05	127.77	8.12	91.88	1445.5	5033.52	5.27	0.02	6.19	1.78	2.24	0.2	4.42	0.25	1.72
PaPd54.3 (night)	PA31	PaBb31-dive 4 (night)	0	-0.25	-0.5	-0.38	fluorescent	3.5	5	0	0	C w/residual A			yes	2	7.54509	134.488	inside	submerged	Ngaremlengui	protected	lagoonal	no	patch reef	2015-01-21	night	night			0	10.9	10 — 15	Babeltheop	0.32	99.09	3.7	96.3	2575.59	5394.8	1.46	0.01	15.97		0.02	0	0	0	0
PaPd55-day	PA31	PaBb31-dive 3 (day)	0	-0.25	0.58	0.16	pale	4	3	0	0	D w/residual A+C	12	61	some	1	7.54509	134.488	inside	submerged	Ngaremlengui	protected	lagoonal	no	patch reef	2015-01-21	midday	day	28.9	33.6	110	10.9	10 — 15	Babeltheop	2.63	2.7	0.1	99.9	2760.45	2.57	0.89	690.11	8.96	0.99	5.88		1.2	0.05	0.07
PaPd55.3 (night)	PA31	PaBb31-dive 4 (night)	0	-0.25	0.57	0.16	pale	4	3	0	0	D w/residual A+C	12	61	yes	2	7.54509	134.488	inside	submerged	Ngaremlengui	protected	lagoonal	no	patch reef	2015-01-21	night	night			0	10.9	10 — 15	Babeltheop	1	3.1	0.13	99.87	2348.22	0.39	3.73	1479.29	9.17	0.23	0.34	0.07	4.57	0.04	0.01
PaPd56.1-2	PA31	PaBb31-dive 3 (day)	0	-0.25	-1.04	-0.65	fluorescent	3.5	5	0	0	C w/ residual A+D	12	74	yes	2	7.54509	134.488	inside	submerged	Ngaremlengui	protected	lagoonal	no	patch reef	2015-01-21	midday	day	28.9	33.6	110	10.6	10 — 15	Babeltheop	0.37	133.81	5.51	94.49	2294.59	1660.44	3.99	1.51	13.9	0.15	0.05	0	0.07	0.01	0.04
PaPd57.1-2	PA31	PaBb31-dive 3 (day)	0	-0.25	-1.82	-1.04	healthy	5	3	0	0	C w/residual A	28	325	yes	2	7.54509	134.488	inside	submerged	Ngaremlengui	protected	lagoonal	no	patch reef	2015-01-21	midday	day	28.9	33.6	69	10.6	10 — 15	Babeltheop	1.15	146.76	8.12	91.88	1660.44	869.49	4.28		4.69	2.46	6.95	0.06	2.11	0.34	0.55
PaPd57.3 (night)	PA31	PaBb31-dive 4 (night)	0	-0.25	0.56	0.15	healthy	5	3	0	0	D w/residual A+C	28	325	yes	2	7.54509	134.488	inside	submerged	Ngaremlengui	protected	lagoonal	no	patch reef	2015-01-21	night	night			0	10.6	10 — 15	Babeltheop	0.6	5.65	0.17	99.83	3320.89	0.79	5.85	3727.57	2	0.5	2.5		12.92	0.25	0.21
PaPd58-day	PA31	PaBb31-dive 3 (day)	0	-0.25	0.55	0.15	healthy	5	3	0	0	D w/residual A+C	41	441	yes	2	7.54509	134.488	inside	submerged	Ngaremlengui	protected	lagoonal	no	patch reef	2015-01-21	midday	day	28.9	33.6	142	10.5	10 — 15	Babeltheop	1.24	7.28	0.2	99.8	3642.43	1.2	2.4	345.06	0.71	0.77	17.02		4.07	0.47	0.18
PaPd59.1-2	PA31	PaBb31-dive 3 (day)	0	-0.25	0.56	0.15	healthy	5	4	0	0	D w/residual A+C	8	35	yes	2	7.54509	134.488	inside	submerged	Ngaremlengui	protected	lagoonal	no	patch reef	2015-01-21	midday	day	28.9	33.6	174	10.5	10 — 15	Babeltheop	1.23	1.95	0.16	99.84	1201.55	1.62	5.65	830.22	23.65	0.03	0.05		0.01	0.01	0
PaPd59.3 (night)	PA31	PaBb31-dive 4 (night)	0	-0.25	0.55	0.15	healthy	5	4	0	0	D w/residual A+C	8	35	yes	2	7.54509	134.488	inside	submerged	Ngaremlengui	protected	lagoonal	no	patch reef	2015-01-21	night	night			0	10.5	10 — 15	Babeltheop	0.49	4.92	0.2	99.8	2459.28	4.09	2.29	1907.35	1.86	0.93	4.89		36.56	0.45	0.89
PaPd60.3 (night)	PA31	PaBb31-dive 4 (night)	0	-0.25	0.56	0.15	healthy	5	4	0	0	D w/residual A+C	23	269	yes	2	7.54509	134.488	inside	submerged	Ngaremlengui	protected	lagoonal	no	patch reef	2015-01-21	night	night			0	9.5	5 — 10	Babeltheop	0.52	2.52	0.15	99.85	1660.44	0.06	2.22	1046.01	8.56	0.6	0.52	0.01	8.33	0.14	0.01
PaPd61.3 (night)	PA31	PaBb31-dive 4 (night)	0	-0.25	0.58	0.16	healthy	5	5	0	0	D w/residual A+C	18	210	yes	2	7.54509	134.488	inside	submerged	Ngaremlengui	protected	lagoonal	no	patch reef	2015-01-21	night	night			0	9.8	5 — 10	Babeltheop	0.51	3.03	0.1	99.9	3098.5	0.83	2	3398.51	10.3	0.25	0.93	0.12	9.79	0.16	0.15
PaPd63	PA36	PaAw36	1.75	-0.25	0.59	0.17	pale	4	3	0-40	30	D w/residual A+C	15	88	yes	2	7.6864	134.546	outside	emergent	Ngardmau	exposed	fore reef	yes	barrier reef	2015-01-22	morning	day	26.8	34.2	28	26.3	25 — 30	Aiwakoko passage outer	0.17	1.35	0.07	99.93	1951.93	0.18	5.91	3477.95	7.28	1.58	5		6.31	0.25	0.02
PaPd64	PA36	PaAw36	1.75	-0.25	-0.6	-0.42	bleached	1	4	0-40	5	C w/ residual A+D	18.5	162	yes	2	7.6864	134.546	outside	emergent	Ngardmau	exposed	fore reef	yes	barrier reef	2015-01-22	morning	day	26.8	34.2	119	15.2	15 — 20	Aiwakoko passage outer	1.03	86.26	4.05	95.95	2044.25	4806.22	3.24	0.05	12.97	0.28	0.6	0	0.23	0.01	0.53
PaPd65-tumor	PA37	PaBb37	0	-0.25	-0.15	-0.2	sick	1	2	0	0	C w/residual A	17	132	yes	2	7.6917	134.558	outside	emergent	Ngarchelong	exposed	fore reef	yes	barrier reef	2015-01-22	midday	day	27.7	34.3	87	24.7	20 — 25	Babeltheop	0.09	22.59	2.53	97.47	869.49	1147.29	2.29	0.01	2	6.47	23.05	0	1.73	0.33	0.17
PaPd67	PA38	PaBb38	0	-0.25	-0.47	-0.36	sick	1	2	0	0	C w/residual A			yes	2	7.6464	134.536	outside	emergent	Ngardmau	intermediate	fore reef	yes	barrier reef	2015-01-22	afternoon	day	27.3	34.3	23	29.1	25 — 30	Babeltheop	0.29	17.52	3.62	96.38	465.95	523.01	1.74	0	2.09	2.64	3.91	0.01	1.16	0.27	0.19
PaPd68	PA40	PaCo40	1.75	-0.25	-0.47	-0.36	bleached	1	3	0-40	10	C w/residual A	16	130	some	1	7.8514	134.507	outside	emergent	Ngarchelong	intermediate	fore reef	yes	barrier reef	2015-01-23	midday	day	28.7	34.1	42	28.7	25 — 30	Babeltheop	2.29	243.99	3.62	96.38	6490.08	8968.72	7.62	0.01	5.85	1.92	9.02	0.11	2.63	0.55	0.7
PaPd69.2	PA40	PaCo40	0	-0.25	-2.64	-1.45	healthy	5	3	0	0	C w/residual A	19	88			7.8514	134.507	outside	emergent	Ngarchelong	intermediate	fore reef	yes	barrier reef	2015-01-23	afternoon	day	28.7	34.1	69	24.7	20 — 25	Babeltheop	1.57	361.37	10.88	89.12	2958.57	8368.11	2.82	0.02	21.07	0.01	0	0	0.01	0	0
PaPd70	PA41	PaBb41	0	-0.25	0.02	-0.12	sick	1	2	0	0	C w/residual A	13	77	yes	2	7.781	134.559	outside	emergent	Ngarchelong	intermediate	fore reef	yes	barrier reef	2015-01-23	afternoon	day	29.1	34.1	46	20.8	20 — 25	Babeltheop	0.58	40.24	1.97	98.03	1997.56	1174.11	3.03	0.01	15.25	0.09	0.12	0	0.06	0.01	0.03
PaPd71	PA41	PaBb41	0	-0.25	-0.15	-0.2	healthy	5	4	0	0	C w/residual A	25	263	yes	2	7.781	134.559	outside	emergent	Ngarchelong	intermediate	fore reef	yes	barrier reef	2015-01-23	afternoon	day	29.1	34.1	42	20	20 — 25	Babeltheop	0.48	76.85	2.53	97.47	2958.57	4589.18	1.05		2.82	2.03	32.54	0.16	3.16	0.75	8.94
PaPd73	PA41	PaBb41	0	-0.25	0.55	0.15	healthy	5	5	0	0	D w/residual A+C			yes	2	7.781	134.559	outside	emergent	Ngarchelong	intermediate	fore reef	yes	barrier reef	2015-01-23	afternoon	day	29.1	34.1	23	9.1	5 — 10	Babeltheop	1.55	5.27	0.18	99.82	2891	8.76	2	1445.5	0.77	3.54	115.86		51.11	2.28	6.31
PaPd75.3 (night)	PA43	PaWb43-night	0	-0.25	0.58	0.17	pale	4	4	0	0	D w/residual A+C	10	42			7.6563	134.565	inside	submerged	Ngardmau	intermediate	back reef	no	back reef	2015-01-24	night	night			0	10	10 — 15	Back reef near Aiwakoko channel	0.52	1.66	0.08	99.92	2190.97	0.29	3.36	1821.22	16.73	0.21	0.15	0.08	3.46	0.01	0.01
PaPd77-day	PA43	PaWb43-day	0	-0.25	0.59	0.17	healthy	5	4	0	0	D w/residual A+C	15	92	yes	2	7.6563	134.565	inside	submerged	Ngardmau	intermediate	back reef	no	back reef	2015-01-24	midday	day	29.1	34	37	11.7	10 — 15	Back reef near Aiwakoko channel	1.03	1.35	0.07	99.93	2044.25	0.21	1.07	1317.89	0.08	0.03	4.02		0.83	0.01	6.02
PaPd77.3 (night)	PA43	PaWb43-night	0	-0.25	0.55	0.15	healthy	5	4	0	0	D w/residual A+C	15	92			7.6563	134.565	inside	submerged	Ngardmau	intermediate	back reef	no	back reef	2015-01-24	night	night			0	11.7	10 — 15	Back reef near Aiwakoko channel	0.74	5.27	0.19	99.81	2824.97	0.41	1.41	3027.73	7.45	0.46	0.57	0.03	4.07	0.12	0.11
PaPd78.1-2	PA43	PaWb43-day	0	-0.25	0.59	0.17	pale	4	3	0	0	D w/residual A+C	23	307	yes	2	7.6563	134.565	inside	submerged	Ngardmau	intermediate	back reef	no	back reef	2015-01-24	midday	day	29.1	34	74	10.5	10 — 15	Back reef near Aiwakoko channel	0.68	0.64	0.05	99.95	1201.55	0.87	3.56	587.06	8.76	1.54	1.61	0.09	10.73	0.3	0.06
PaPd78.3 (night)	PA43	PaWb43-night	0	-0.25	0.51	0.13	pale	4	3	0	0	D w/residual A+C	23	307			7.6563	134.565	inside	submerged	Ngardmau	intermediate	back reef	no	back reef	2015-01-24	night	night			0	10.5	10 — 15	Back reef near Aiwakoko channel	0.5	8.56	0.32	99.68	2697.4	0.12	1.86	4281.85	6.49	0.46	1.22	0	3.63	0.14	0.05
PaPd79.3 (night)	PA43	PaWb43-night	0	-0.25	0.57	0.16	pale	4	4	0	0	D w/residual A+C	29	334			7.6563	134.565	inside	submerged	Ngardmau	intermediate	back reef	no	back reef	2015-01-24	night	night	29.1	34	0	9.5	5 — 10	Back reef near Aiwakoko channel	0.69	1.7	0.11	99.89	1479.29	0.23	2.14	160.97	12.68	0.88	8.32	0.01	2.13	0.45	0.18
PaPd80-day	PA43	PaWb43-day	0	-0.25	0.58	0.16	healthy	5	5	0	0	D w/residual A+C	20	206	yes	2	7.6563	134.565	inside	submerged	Ngardmau	intermediate	back reef	no	back reef	2015-01-24	midday	day	29.1	34	119	11.8	10 — 15	Back reef near Aiwakoko channel	0.66	2.4	0.1	99.9	2403.11	0.29	0.98	1022.12	7.8	0.95	9.55		1.65	0.38	0.35
PaPd80.3 (night)	PA43	PaWb43-night	0	-0.25	0.56	0.15	healthy	5	5	0	0	D w/residual A+C	20	206			7.6563	134.565	inside	submerged	Ngardmau	intermediate	back reef	no	back reef	2015-01-24	night	night			0	11.8	10 — 15	Back reef near Aiwakoko channel	0.47	3.81	0.15	99.85	2516.76	0.29	1.02	1907.35	0.04		0.22	2.78	2.39	0.06	1.34
PaPd81-day	PA43	PaWb43-day	0	-0.25	0.57	0.16	pale	4	3	0	0	D w/residual A+C	15	92	yes	2	7.6563	134.565	inside	submerged	Ngardmau	intermediate	back reef	no	back reef	2015-01-24	midday	day	29.1	34	101	10.3	10 — 15	Back reef near Aiwakoko channel	0.38	3.1	0.13	99.87	2459.28	0.83	1.86	1738.97	9.39	0.57	6.3		5.13	0.29	0.13
PaPd81.3 (night)	PA43	PaWb43-night	0	-0.25	0.55	0.15	pale	4	3	0	0	D w/residual A+C	15	92			7.6563	134.565	inside	submerged	Ngardmau	intermediate	back reef	no	back reef	2015-01-24	night	night			0	10.3	10 — 15	Back reef near Aiwakoko channel	0.55	3.9	0.18	99.82	2190.97	0.49	3.17	3398.51	10.54	0.15	0.75		5.13	0.06	0.07
PaPd82.1-2	PA43	PaWb43-day	0	-0.25	0.6	0.17	healthy	5	4	0	0	D w/residual A+C	23	297	yes	2	7.6563	134.565	inside	submerged	Ngardmau	intermediate	back reef	no	back reef	2015-01-24	midday	day	29.1	34	161	10	10 — 15	Back reef near Aiwakoko channel	0.38	0.71	0.04	99.96	1907.35	1.26	2.07	706.24	8.56	1.47	1.37		2.01	0.14	0.04
PaPd82.3 (night	PA43	PaWb43-night	0	-0.25	0.59	0.17	healthy	5	4	0	0	D w/residual A+C	23	297			7.6563	134.565	inside	submerged	Ngardmau	intermediate	back reef	no	back reef	2015-01-24	night	night			0	10	10 — 15	Back reef near Aiwakoko channel	0.1	1.29	0.07	99.93	1738.97	0.05	3.99	1907.35	6.34	0.64	1.31	0.04	15.53	0.05	0.03
PaPd83-day	PA43	PaWb43-day	0	-0.25	0.56	0.15	pale	4	4	0	0	D w/residual A+C	14	131	yes	2	7.6563	134.565	inside	submerged	Ngardmau	intermediate	back reef	no	back reef	2015-01-24	midday	day	29.1	34	110	11	10 — 15	Back reef near Aiwakoko channel	0.28	4.48	0.15	99.85	2891	1.15	2.29	2958.57	5.65	1.04	7.76		4.57	0.44	0.29
PaPd83.3 (night)	PA43	PaWb43-night	0	-0.25	0.55	0.15	pale	4	4	0	0	D w/residual A+C	14	131			7.6563	134.565	inside	submerged	Ngardmau	intermediate	back reef	no	back reef	2015-01-24	night	night			0	11	10 — 15	Back reef near Aiwakoko channel	0.58	3.9	0.19	99.81	2044.25	0.34	2.37	910.61	6.95	0.33	1.77		5.63	0.12	0.27
PaPd85	PA45	PaWb45	3.25	2.4	-0.04	1.18	bleached	1	1	40-80	75	C w/residual A	9	25	yes	2	7.7717	134.565	outside	submerged	Ngarchelong	intermediate	fore reef	yes	barrier reef	2015-01-25	morning	day	28.1	34.2	37	26	25 — 30	Babeltheop	1.86	59.6	2.16	97.84	2697.4	2760.45	1.17	0.03	2	2.03	15.18	0.38	6.75	0.23	24.05
PaPd86	PA45	PaWb45	0	-0.25	-4.06	-2.15	pale	4	4	0	0	C w/residual A	10	49	yes	2	7.7717	134.565	outside	submerged	Ngarchelong	intermediate	fore reef	yes	barrier reef	2015-01-25	morning	day	28.1	34.2	124	15	15 — 20	Babeltheop	2.23	756.93	15.62	84.38	4088.49	6797.02	3.48	0.04	7.11	0.4	5.02	0.04	0.5	0.28	1.74
PaPd87-tumor	PA47	PaWb47	0	-0.25	0.52	0.13	sick	1	4	0	0	D w/residual A+C	9	27	yes	2	7.6403	134.547	inside	emergent	Ngardmau	intermediate	back reef	no	channel reef	2015-01-25	afternoon	day	28.8	34.3	19	26	25 — 30	Aiwakoko Passage inner	1.9	3.1	0.3	99.7	1046.01	0.32	2.52	2092.03	12.39	0.66	5.49	0.04	2.04	0.06	0.01
PaPd89.2	PA47	PaWb47	0	-0.25	0.59	0.17	sick	1	2	0	0	D w/residual A+C	11	62			7.6403	134.547	inside	emergent	Ngardmau	intermediate	back reef	no	channel reef	2015-01-25	afternoon	day	28.8	34.3	28	10.8	10 — 15	Aiwakoko Passage inner	0.48	1.86	0.07	99.93	2635.79	0.08	2.63	629.19	4.69	0.44	1.37	0.01	29.66	0.16	0.53
PaPd90	PA47	PaWb47	0	-0.25	0.55	0.15	fluorescent	3.5	5	0	0	D w/residual A+C			yes	2	7.6403	134.547	inside	emergent	Ngardmau	intermediate	back reef	no	channel reef	2015-01-25	afternoon	day	28.8	34.3	64	5.8	5 — 10	Aiwakoko Passage inner	0.96	5.27	0.19	99.81	2697.4	0.33	3.99	314.6	15.97	0.47	2.74	0.01	2.23	0.12	0.02
PaPd91	PA48	PaWb48	0	-0.25	0.58	0.16	healthy	5	5	0	0	D w/residual A+C	14	95	yes	2	7.7156	134.584	inside	emergent	Ngarchelong	protected	back reef	no	patch reef	2015-01-26	morning	day	29	34	23	23.8	20 — 25	Aiwakoko lagoonal area	1.13	2.63	0.09	99.91	2824.97	0.41	2	136.94	2.82	0.72	1.69		5.01	0.36	0.61
PaPd92-bleached	PA48	PaWb48	1.75	-0.25	-0.28	-0.26	bleached	1	4	0-40	1	C w/residual A	26	238	yes	2	7.7156	134.584	inside	emergent	Ngarchelong	protected	back reef	no	patch reef	2015-01-26	morning	day	29	34	28	20	20 — 25	Aiwakoko lagoonal area	1.72	78.65	2.96	97.04	2575.59	975.97	2.73	0.01	0.41	0.02	0.2		0.08	0.01	11.57
PaPd93-bleached	PA48	PaWb48	3.25	2.4	0.59	1.5	bleached	1	1	40-80	50	D w/residual A+C	10	49	no	0	7.7156	134.584	inside	emergent	Ngarchelong	protected	back reef	no	patch reef	2015-01-26	morning	day	29	34	60	13.7	10 — 15	Aiwakoko lagoonal area	0.55	0.93	0.05	99.95	1951.93	0.56	2.14	1287.79	0.08	0.02	0.38		0.5	0.01	13.99
PaPd95-bleached	PA50	PaWb50	1.75	-0.25	0.6	0.17	bleached	1	3	0-40	15	D w/residual A+C			yes	2	7.6674	134.599	inside	emergent	Ngaraard	protected	lagoonal	no	patch reef	2015-01-26	afternoon	day	29.2	34.1	42	13.7	10 — 15	Aiwakoko lagoonal area	0.68	0.64	0.04	99.96	1779.62	0.06	3.99	424.81	21.57	0.07	0.02	0.03	0.1	0.01	0.02
PaPd98-bleached	PA51	PaAw51	1.75	-0.25	0.59	0.17	bleached	1	4	0-40	1	D w/residual A+C	16	104	yes	2	7.5986	134.508	inside	submerged	Ngardmau	protected	back reef	no	patch reef	2015-01-27	morning	day	28.6	34	51	15.2	15 — 20	Aiwakoko lagoonal area	0.5	1.58	0.07	99.93	2403.11	1.02	2.96	193.66	7.45	1.28	0.81	0.18	1.85	0.88	0.2
PaPd99-bleached	PA51	PaAw51	5	5.06	0.59	2.83	bleached	1	1	>80	90	D w/residual A+C	15	89	yes	2	7.5986	134.508	inside	submerged	Ngardmau	protected	back reef	no	patch reef	2015-01-27	morning	day	28.6	34	64	10.9	10 — 15	Aiwakoko lagoonal area	0.74	1.23	0.06	99.94	1907.35	0.14	3.6	212.41	5.91	2.56	3.88	0.22	6.92	0.91	0.02
PaPd101	PA52	PaAw52-day	0	-0.25	0.57	0.16	healthy	5	5	0	0	D w/residual A+C	14	80	yes	2	7.6254	134.561	inside	submerged	Ngardmau	protected	lagoonal	no	patch reef	2015-01-27	midday	day	29	34	32	9.4	5 — 10	Aiwakoko lagoonal area	1.11	3.48	0.14	99.86	2516.76	0.37	1.46	629.19	6.79	1.69	5.24	0.03	1.54	0.49	0.34
PaPd102-day	PA52	PaAw52-day	1.75	-0.25	0.08	-0.08	healthy	5	4	0-40	5	C w/residual A	30	508	yes	2	7.6254	134.561	inside	submerged	Ngardmau	protected	lagoonal	no	patch reef	2015-01-27	midday	day	29	34	229	9.1	5 — 10	Aiwakoko lagoonal area	1.52	55.61	1.76	98.24	3098.5	792.73	2.63	0.02	3.1	1.02	7.24	0.42	9.07	0.7	15.09
PaPd102.3 (night)	PA52	PaAw52-night	1.75	-0.25	-0.74	-0.49	healthy	5	4	0-40	5	C w/residual A	30	508			7.6254	134.561	inside	submerged	Ngardmau	protected	lagoonal	no	patch reef	2015-01-27	night	night			0	9.1	5 — 10	Aiwakoko lagoonal area	0.2	153.7	4.52	95.48	3245.04	1549.25	4.8	0	13.28	0.21	0.13	0.01	0.74	0.01	0.53
PaPd103.3 (night)	PA52	PaAw52-night	0	-0.25	0.57	0.16	healthy	5	4	0	0	D w/residual A+C	12	63			7.6254	134.561	inside	submerged	Ngardmau	protected	lagoonal	no	patch reef	2015-01-27	night	night			0	10.1	10 — 15	Aiwakoko lagoonal area	0.33	2.82	0.13	99.87	2190.97	0.07	6.95	2635.79	8.17	0.69	0.47	0.1	8.72	0.16	0.04
PaPd104.1-2	PA52	PaAw52-day	0	-0.25	0.59	0.17	pale	4	4	0	0	D w/residual A+C	21	195	yes	2	7.6254	134.561	inside	submerged	Ngardmau	protected	lagoonal	no	patch reef	2015-01-27	midday	day	29	34	257	10.7	10 — 15	Aiwakoko lagoonal area	1.09	0.66	0.06	99.94	1070.46	0.24	1.8	560.54	5.27	0.57	0.43	0.03	0.32	0.06	0.06
PaPd104.3 (night)	PA52	PaAw52-night	0	-0.25	0.59	0.17	healthy	5	4	0	0	D w/residual A+C	21	195			7.6254	134.561	inside	submerged	Ngardmau	protected	lagoonal	no	patch reef	2015-01-27	night	night			0	10.7	10 — 15	Aiwakoko lagoonal area	0.47	2.24	0.07	99.93	3098.5	0.41	0.71	3642.43	1.2	1.04	3.46		24.66	0.36	1.34
PaPd105-day	PA52	PaAw52-day	0	-0.25	0.58	0.16	healthy	5	3	0	0	D w/residual A+C	10	61	yes	2	7.6254	134.561	inside	submerged	Ngardmau	protected	lagoonal	no	patch reef	2015-01-27	midday	day	29	34	46	9.1	5 — 10	Aiwakoko lagoonal area	0.68	2.52	0.09	99.91	2697.4	0.64	1.51	1699.25	7.11	0.54	3.15		7.42	0.3	0.24
PaPd105.3 (night)	PA52	PaAw52-night	0	-0.25	0.52	0.13	healthy	5	3	0	0	D w/residual A+C	10	61			7.6254	134.561	inside	submerged	Ngardmau	protected	lagoonal	no	patch reef	2015-01-27	night	night			0	9.1	5 — 10	Aiwakoko lagoonal area	0.54	8.56	0.29	99.71	2958.57	0.81	1.23	8763.87	1.62	0.97	1.09		14.52	0.29	0.42
PaPd106.2	PA54	PaVl54	0	-0.25	-3.14	-1.7	bleached	1	3	0	0	C w/residual A					8.1677	134.608	outside	emergent	Kayangel	intermediate	fore reef	yes	patch reef	2015-01-28	morning	day	28.4	34.2				Ngaruangl (Vellasco) reef	0.56	222.45	12.56	87.44	1549.25	5520.89	4.13	0	2.29	1.2	1.91	0.48	4.05	0.48	1.5
PaPd107	PA60	PaNW60	0	-0.25	-0.08	-0.17	healthy	5	3	0	0	C w/ residual A+D	10	33	yes	2	7.8708	134.504	outside	emergent	Ngarchelong	intermediate	fore reef	yes	barrier reef	2015-01-30	morning	day	27.9	34.3	42	25.5	25 — 30	Northwest Reef	1.19	68.47	2.31	97.69	2891	1174.11	4.92	0.18	11.04	0.1	0.01	0	0.02	0	0
PaPd108-tumor	PA60	PaNw60	5	5.06	0.06	2.56	sick	1	3	>80	100	C w/residual A					7.8708	134.504	outside	emergent	Ngarchelong	intermediate	fore reef	yes	barrier reef	2015-01-30	morning	day	27.9	34.3	28	24.9	20 — 25	Northwest Reef	0.73	58.24	1.85	98.15	3098.5	1095.48	5.65	0.02	0.14	0.6	8.82	1.35	6.5	1.33	15.27
PaPd109	PA61	PaNw61	0	-0.25	-0.68	-0.47	healthy	5	5	0	0	C w/residual A	6	18	some	1	7.8905	134.587	inside	submerged	Ngarchelong	protected	lagoonal	no	patch reef	2015-01-30	midday	day	29	34.3	69	24.1	20 — 25	Northwest Reef	1.78	84.29	4.33	95.67	1863.78	2891	3.13	0.01	23.11	0	0.05	0	0	0.01	0
PaPd110	PA61	PaNw61	5	5.06	-0.68	2.19	bleached	1	5	>80	80	C w/residual A	13	49	yes	2	7.8905	134.587	inside	submerged	Ngarchelong	protected	lagoonal	no	patch reef	2015-01-30	midday	day	29	34.3	97	20.6	20 — 25	Northwest Reef	1.36	136.94	4.33	95.67	3027.73	3098.5	2.7	0.04	11.83	0.67	19.14	0.09	0.97	0.55	5.74
PaPd111	PA62	PaNw62	0	-0.25	-1.53	-0.89	healthy	5	5	0	0	C w/ residual A+D	15	50	yes	2	7.9654	134.577	inside	emergent	Ngarchelong	intermediate	back reef	no	back reef	2015-01-30	afternoon	day	29	31.6	60	24.3	20 — 25	Northwest Reef	2.52	345.06	7.14	92.86	4484.36	18785.8	3.86	0.74	1.38	1.47	33.32	2.46	7.98	0.97	21.55
PaPd113	PA62	PaNw62	5	5.06	-0.36	2.35	bleached	1	1	>80	80	C w/residual A	21	122	yes	2	7.9654	134.577	inside	emergent	Ngarchelong	intermediate	back reef	no	back reef	2015-01-30	afternoon	day	29	31.6	46	20.2	20 — 25	Northwest Reef	2.33	84.29	3.24	96.76	2516.76	4484.36	1.8	0.01	11.56	0.38	12.33	0.04	0.47	0.14	1.52
PaPd114	PA65	PaNw65	0	-0.25	0.56	0.15	pale	4	2	0	0	D w/residual A+C	13	67	yes	2	7.9539	134.627	inside	emergent	Ngarchelong	intermediate	back reef	no	back reef	2015-01-31	afternoon	day	29.1	34.2	42	20.8	20 — 25	Northwest Reef, northern passage	1.39	5.39	0.17	99.83	3098.5	0.3	1.82	600.78	11.83	0.33	2.81	0	4.46	0.39	0.07
PaPd117	PA69	PaAw69	0	-0.25	0.59	0.17	pale	4	2	0	0	D w/residual A+C	9	29	yes	2	7.7746	134.588	inside	submerged	Ngarchelong	protected	lagoonal	no	patch reef	2015-02-02	morning	day	28.8	34.2	14				0.89	1.78	0.05	99.95	3245.04	0.11	6.34	293.53	4.69	0.18	0.37	0.6	0.5	0.05	0.08
PaPd118	PA69	PaAw69	0	-0.25	-0.4	-0.33	healthy	5	5	0	0	C w/residual A	29	407	yes	2	7.7746	134.588	inside	submerged	Ngarchelong	protected	lagoonal	no	patch reef	2015-02-02	morning	day	28.8	34.2	19				2.08	116.49	3.39	96.61	3320.89	1070.46	4.92		15.25	0.19	9.56	0.02	0.69	0.06	4.21
PaPd119	PA69	PaAw69	0	-0.25	-0.66	-0.46	bleached	1	1	0	0	C w/residual A	10	55	yes	2	7.7746	134.588	inside	submerged	Ngarchelong	protected	lagoonal	no	patch reef	2015-02-02	midday	day	28.8	34.2	14				0.24	150.19	4.23	95.77	3398.51	3398.51	3.24	0.01	29.12	0	0.03	0	0	0	0
PaPd124	PA72	PaAw72	3.25	2.4	0.58	1.49	bleached	1	2	40-80	50	D w/residual A+C	15	96	yes	2	7.6572	134.58	inside	submerged	Ngardmau	protected	lagoonal	no	patch reef	2015-02-03	afternoon	day	28.8	34.2	14	14.5	10 — 15		0.77	2.96	0.1	99.9	3027.73	0.11	4.43	811.26	12.97	0.36	0.61	0.02	3.3	0.04	0.01
PaPd125-day	PA74	PaAw74-day	0	-0.25	0.54	0.15	healthy	5	5	0	0	D w/residual A+C	17	183	yes	2	7.6327	134.595	inside	submerged	Ngaraard	protected	lagoonal	no	patch reef	2015-02-04	midday	day	28.6	34.2	106	9.1	5 — 10		0.23	6.64	0.21	99.79	3170.92	0.29	1.03	1348.7	11.04	0.63	0.84		2.57	0.3	0.05
PaPd125.2 (night)	PA74	PaAw74-night	0	-0.25	0.57	0.16	healthy	5	5	0	0	D w/residual A+C	17	183			7.6327	134.595	inside	submerged	Ngaraard	protected	lagoonal	no	patch reef	2015-02-04	night	night			0	9.1	5 — 10		0.91	4.69	0.14	99.86	3398.51	0.26	3.73	1779.62	10.78	0.64	1.69		7.09	0.35	0.24
PaPd126.1 (day)	PA74	PaAw74-day	0	-0.25	0.57	0.16	healthy	5	5	0	0	D w/residual A+C	30	435	yes	2	7.6327	134.595	inside	submerged	Ngaraard	protected	lagoonal	no	patch reef	2015-02-04	midday	day	28.6	34.2	92	9.3	5 — 10		0.57	3.73	0.12	99.88	3027.73	0.57	3.48	3559.24	2.46	1.06	3.71		25.83	0.31	2.5
PaPd126.2 (night)	PA74	PaAw74-night	0	-0.25	0.53	0.14	healthy	5	5	0	0	D w/residual A+C	30	435			7.6327	134.595	inside	submerged	Ngaraard	protected	lagoonal	no	patch reef	2015-02-04	night	night			0	9.3	5 — 10		1.55	6.95	0.26	99.74	2697.4	0.79	2.46	2242.18	7.99	0.58	1.28		5.02	0.38	0.1
PaPd127.2 (night)	PA74	PaAw74-night	0	-0.25	0.56	0.15	fluorescent	3.5	5	0	0	D w/residual A+C	18	209			7.6327	134.595	inside	submerged	Ngaraard	protected	lagoonal	no	patch reef	2015-02-04	night	night			0	9.7	5 — 10		1.69	4.92	0.17	99.83	2958.57	0.16	0.76	690.11	1.95	1.02	2.71		12.34	0.61	1.73
PaPd128.1 (day)	PA74	PaAw74-day	0	-0.25	0.5	0.12	healthy	5	4	0	0	D w/residual A+C	18	148	yes	2	7.6327	134.595	inside	submerged	Ngaraard	protected	lagoonal	no	patch reef	2015-02-04	midday	day	28.6	34.2	32	11.5	10 — 15		1.98	7.11	0.36	99.64	1951.93	0.3	3.86	8368.11	7.28	0.99	0.53		7.44	0.15	0.01
PaPd128.2 (night)	PA74	PaAw74-night	0	-0.25	0.54	0.15	healthy	5	4	0	0	D w/residual A+C	18	148			7.6327	134.595	inside	submerged	Ngaraard	protected	lagoonal	no	patch reef	2015-02-04	night	night			0	11.5	10 — 15		1.67	5.15	0.21	99.79	2459.28	0.17	6.71	3245.04	7.99	1.25	2.5	0	8.53	0.22	0.01
PaPd130.1 (day)	PA74	PaAw74-day	0	-0.25	0.54	0.14	healthy	5	5	0	0	D w/residual A+C	14	98	yes	2	7.6327	134.595	inside	submerged	Ngaraard	protected	lagoonal	no	patch reef	2015-02-04	midday	day	28.6	34.2	51	10.8	10 — 15		1.11	4.48	0.23	99.77	1951.93	0.1	4.28	5649.94	5.15	1.31	1.31	0	16.67	0.36	0.01
PaPd131.1 (day)	PA74	PaAw74-day	0	-0.25	0.42	0.08	pale	4	4	0	0	D w/residual A+C	14	92	yes	2	7.6327	134.595	inside	submerged	Ngaraard	protected	lagoonal	no	patch reef	2015-02-04	midday	day	28.6	34.2	60	8.3	5 — 10		0.82	6.19	0.63	99.37	975.97	0.06	2.14	2348.22	6.79	0.53	0.31		0.64	0.17	0
PaPd131.2 (night)	PA74	PaAw74-night	0	-0.25	0.53	0.14	pale	4	4	0	0	D w/residual A+C	14	92			7.6327	134.595	inside	submerged	Ngaraard	protected	lagoonal	no	patch reef	2015-02-04	night	night			0	8.3	5 — 10		0.39	5.39	0.25	99.75	2190.97	0.41	3.03	2092.03	12.1	0.42	0.7		2.39	0.11	0.18
PaPd132.1 (day)	PA74	PaAw74-day	0	-0.25	-5.25	-2.75	healthy	5	5	0	0	C w/ residual A+D	9	49	yes	2	7.6327	134.595	inside	submerged	Ngaraard	protected	lagoonal	no	patch reef	2015-02-04	midday	day	28.6	34.2	51	10.5	10 — 15		0.53	217.37	19.63	80.37	889.81	2697.4	3.73	0.11	4.92	1.09	1.94	0.04	1.96	0.73	0.29
PaPd134.2 (night)	PA74	PaAw74-night	0	-0.25	0.58	0.16	healthy	5	5	0	0	D w/residual A+C	15	102			7.6327	134.595	inside	submerged	Ngaraard	protected	lagoonal	no	patch reef	2015-02-04	night	night			0	9.9	5 — 10		1.1	3.99	0.1	99.9	3903.86	0.33	6.34	1738.97	12.68	0.45	1.04	0	6.17	0.09	0
PaPd136	PA76	Pa76	0	-0.25	0.56	0.15	healthy	5	5	0	0	D w/residual A+C	11	53	some	1	7.82929	134.52	outside	submerged	Ngarchelong	intermediate	fore reef	yes	fringing reef	2015-02-05	morning	day	27.1	34.4	138	11.7	10 — 15		1.51	4.59	0.15	99.85	3027.73	0.56	5.15	2044.25	8.76	0.33	0.25	0.02	1.28	0.02	0.01
PaPd147	PA84	Pa84	1.75	-0.25	0.53	0.14	sick	1	4	0-40	5	D w/residual A+C	17	132	yes	2	7.5074	134.445	inside	submerged	Ngatpang	protected	lagoonal	no	patch reef	2015-02-08	midday	day	27.7	34.2	46	10.3	10 — 15		0.31	3.32	0.28	99.72	1201.55	0.12	4.13	1738.97	8.96	0.66	0.66	0.01	1.86	0.2	0.01
												D=Durusdinium
												A=Symbiodinium
												C=Cladocopium
[truncated: 133 more columns]

## Sheet: model terms
predictor subset name	predictor name	type of factor	total number of predictors
ENV only (n=17)	Sym assemblage	lab-based physiological factor	17
ENV only (n=17)	max length (cm)	in situ physiological factor	17
ENV only (n=17)	polyps extended	in situ physiological factor	17
ENV only (n=17)	latitude	environmental factor	17
ENV only (n=17)	longitude	environmental factor	17
ENV only (n=17)	lagoon	environmental factor	17
ENV only (n=17)	reef emergence	environmental factor	17
ENV only (n=17)	exposure	environmental factor	17
ENV only (n=17)	reef location	environmental factor	17
ENV only (n=17)	forereef?	environmental factor	17
ENV only (n=17)	reef type	environmental factor	17
ENV only (n=17)	time-binned	environmental factor	17
ENV only (n=17)	night-day	environmental factor	17
ENV only (n=17)	temperature (C)	environmental factor	17
ENV only (n=17)	salinity	environmental factor	17
ENV only (n=17)	PAR	environmental factor	17
ENV only (n=17)	depth (m)	environmental factor	17
12 ENV+6 simple ECO	latitude	environmental factor	18
12 ENV+6 simple ECO	longitude	environmental factor	18
12 ENV+6 simple ECO	lagoon	environmental factor	18
12 ENV+6 simple ECO	reef emergence	environmental factor	18
12 ENV+6 simple ECO	exposure	environmental factor	18
12 ENV+6 simple ECO	reef location	environmental factor	18
12 ENV+6 simple ECO	forereef?	environmental factor	18
12 ENV+6 simple ECO	reef type	environmental factor	18
12 ENV+6 simple ECO	temperature (C)	environmental factor	18
12 ENV+6 simple ECO	salinity	environmental factor	18
12 ENV+6 simple ECO	PAR	environmental factor	18
12 ENV+6 simple ECO	depth (m)	environmental factor	18
12 ENV+6 simple ECO	evenness	ecological factor	18
12 ENV+6 simple ECO	Shannon diversity	ecological factor	18
12 ENV+6 simple ECO	generic diversity	ecological factor	18
12 ENV+6 simple ECO	total algal cover	ecological factor	18
12 ENV+6 simple ECO	coral/algae	ecological factor	18
12 ENV+6 simple ECO	coral cover	ecological factor	18
23 predictors	Sym assemblage	lab-based physiological factor	23
23 predictors	max length (cm)	in situ physiological factor	23
23 predictors	polyps extended	in situ physiological factor	23
23 predictors	latitude	environmental factor	23
23 predictors	longitude	environmental factor	23
23 predictors	lagoon	environmental factor	23
23 predictors	reef emergence	environmental factor	23
23 predictors	exposure	environmental factor	23
23 predictors	reef location	environmental factor	23
23 predictors	forereef?	environmental factor	23
23 predictors	reef type	environmental factor	23
23 predictors	time-binned	environmental factor	23
23 predictors	night-day	environmental factor	23
23 predictors	temperature (C)	environmental factor	23
23 predictors	salinity	environmental factor	23
23 predictors	PAR	environmental factor	23
23 predictors	depth (m)	environmental factor	23
23 predictors	generic diversity	ecological factor	23
23 predictors	generic diversity-binned	ecological factor	23
23 predictors	total algal cover	ecological factor	23
23 predictors	coral/algae	ecological factor	23
23 predictors	coral cover	ecological factor	23
23 predictors	coral cover-binned	ecological factor	23
22 predictors	max length (cm)	in situ physiological factor	22
22 predictors	polyps extended	in situ physiological factor	22
22 predictors	latitude	environmental factor	22
22 predictors	longitude	environmental factor	22
22 predictors	lagoon	environmental factor	22
22 predictors	reef emergence	environmental factor	22
22 predictors	exposure	environmental factor	22
22 predictors	reef location	environmental factor	22
22 predictors	forereef?	environmental factor	22
22 predictors	reef type	environmental factor	22
22 predictors	time-binned	environmental factor	22
22 predictors	night-day	environmental factor	22
22 predictors	temperature (C)	environmental factor	22
22 predictors	salinity	environmental factor	22
22 predictors	PAR	environmental factor	22
22 predictors	depth (m)	environmental factor	22
22 predictors	generic diversity	ecological factor	22
22 predictors	generic diversity-binned	ecological factor	22
22 predictors	total algal cover	ecological factor	22
22 predictors	coral/algae	ecological factor	22
22 predictors	coral cover	ecological factor	22
22 predictors	coral cover-binned	ecological factor	22
17 ENV+5 Phys+73 ECO	Sym assemblage	lab-based physiological factor	96
17 ENV+5 Phys+73 ECO	max length (cm)	in situ physiological factor	96
17 ENV+5 Phys+73 ECO	planar SA (cm2)	in situ physiological factor	96
17 ENV+5 Phys+73 ECO	polyps extended	in situ physiological factor	96
17 ENV+5 Phys+73 ECO	polyps extended (cont)	in situ physiological factor	96
17 ENV+5 Phys+73 ECO	latitude	environmental factor	96
17 ENV+5 Phys+73 ECO	longitude	environmental factor	96
17 ENV+5 Phys+73 ECO	lagoon	environmental factor	96
17 ENV+5 Phys+73 ECO	reef emergence	environmental factor	96
17 ENV+5 Phys+73 ECO	island	environmental factor	96
17 ENV+5 Phys+73 ECO	exposure	environmental factor	96
17 ENV+5 Phys+73 ECO	reef location	environmental factor	96
17 ENV+5 Phys+73 ECO	forereef?	environmental factor	96
17 ENV+5 Phys+73 ECO	reef type	environmental factor	96
17 ENV+5 Phys+73 ECO	collection date	environmental factor	96
17 ENV+5 Phys+73 ECO	time-binned	environmental factor	96
17 ENV+5 Phys+73 ECO	night-day	environmental factor	96
17 ENV+5 Phys+73 ECO	temperature (C)	environmental factor	96
17 ENV+5 Phys+73 ECO	salinity	environmental factor	96
17 ENV+5 Phys+73 ECO	PAR	environmental factor	96
17 ENV+5 Phys+73 ECO	depth (m)	environmental factor	96
17 ENV+5 Phys+73 ECO	depth (binned)	environmental factor	96
17 ENV+5 Phys+73 ECO	PB	ecological factor	96
17 ENV+5 Phys+73 ECO	PITS	ecological factor	96
17 ENV+5 Phys+73 ECO	PTSTS	ecological factor	96
17 ENV+5 Phys+73 ECO	PTTS	ecological factor	96
17 ENV+5 Phys+73 ECO	PCCATS	ecological factor	96
17 ENV+5 Phys+73 ECO	PCYTS	ecological factor	96
17 ENV+5 Phys+73 ECO	PETS	ecological factor	96
17 ENV+5 Phys+73 ECO	PMTS	ecological factor	96
17 ENV+5 Phys+73 ECO	ACAN	ecological factor	96
17 ENV+5 Phys+73 ECO	ACRO	ecological factor	96
17 ENV+5 Phys+73 ECO	ALVE	ecological factor	96
17 ENV+5 Phys+73 ECO	ANAC	ecological factor	96
17 ENV+5 Phys+73 ECO	ASTR	ecological factor	96
17 ENV+5 Phys+73 ECO	CATA	ecological factor	96
17 ENV+5 Phys+73 ECO	CAUL	ecological factor	96
17 ENV+5 Phys+73 ECO	COEL	ecological factor	96
17 ENV+5 Phys+73 ECO	COSC	ecological factor	96
17 ENV+5 Phys+73 ECO	CTEN	ecological factor	96
17 ENV+5 Phys+73 ECO	CYPH	ecological factor	96
17 ENV+5 Phys+73 ECO	DIPL	ecological factor	96
17 ENV+5 Phys+73 ECO	ECHN	ecological factor	96
17 ENV+5 Phys+73 ECO	EPHY	ecological factor	96
17 ENV+5 Phys+73 ECO	EUPH	ecological factor	96
17 ENV+5 Phys+73 ECO	FUNG	ecological factor	96
17 ENV+5 Phys+73 ECO	FVIA	ecological factor	96
17 ENV+5 Phys+73 ECO	FVIT	ecological factor	96
17 ENV+5 Phys+73 ECO	GALA	ecological factor	96
17 ENV+5 Phys+73 ECO	GARD	ecological factor	96
17 ENV+5 Phys+73 ECO	GNIA	ecological factor	96
17 ENV+5 Phys+73 ECO	GONI	ecological factor	96
17 ENV+5 Phys+73 ECO	HEFU	ecological factor	96
17 ENV+5 Phys+73 ECO	HALO	ecological factor	96
17 ENV+5 Phys+73 ECO	HELI	ecological factor	96
17 ENV+5 Phys+73 ECO	HELIO	ecological factor	96
17 ENV+5 Phys+73 ECO	HYDN	ecological factor	96
17 ENV+5 Phys+73 ECO	ISOP	ecological factor	96
17 ENV+5 Phys+73 ECO	LOBO	ecological factor	96
17 ENV+5 Phys+73 ECO	LORI	ecological factor	96
17 ENV+5 Phys+73 ECO	LPTO	ecological factor	96
17 ENV+5 Phys+73 ECO	LPTA	ecological factor	96
17 ENV+5 Phys+73 ECO	MERU	ecological factor	96
17 ENV+5 Phys+73 ECO	MILL	ecological factor	96
17 ENV+5 Phys+73 ECO	MNTA	ecological factor	96
17 ENV+5 Phys+73 ECO	MNTI	ecological factor	96
17 ENV+5 Phys+73 ECO	MYCE	ecological factor	96
17 ENV+5 Phys+73 ECO	OXYP	ecological factor	96
17 ENV+5 Phys+73 ECO	PACH	ecological factor	96
17 ENV+5 Phys+73 ECO	PARA	ecological factor	96
17 ENV+5 Phys+73 ECO	PAVO	ecological factor	96
17 ENV+5 Phys+73 ECO	PECT	ecological factor	96
17 ENV+5 Phys+73 ECO	PHYS	ecological factor	96
17 ENV+5 Phys+73 ECO	PLAY	ecological factor	96
17 ENV+5 Phys+73 ECO	PLES	ecological factor	96
17 ENV+5 Phys+73 ECO	PLRO	ecological factor	96
17 ENV+5 Phys+73 ECO	POCI	ecological factor	96
17 ENV+5 Phys+73 ECO	PODA	ecological factor	96
17 ENV+5 Phys+73 ECO	POLY	ecological factor	96
17 ENV+5 Phys+73 ECO	PORI	ecological factor	96
17 ENV+5 Phys+73 ECO	PSAM	ecological factor	96
17 ENV+5 Phys+73 ECO	SAND	ecological factor	96
17 ENV+5 Phys+73 ECO	SCOE	ecological factor	96
17 ENV+5 Phys+73 ECO	SCOL	ecological factor	96
17 ENV+5 Phys+73 ECO	SERI	ecological factor	96
17 ENV+5 Phys+73 ECO	STYL	ecological factor	96
17 ENV+5 Phys+73 ECO	STYS	ecological factor	96
17 ENV+5 Phys+73 ECO	SYMP	ecological factor	96
17 ENV+5 Phys+73 ECO	TRAC	ecological factor	96
17 ENV+5 Phys+73 ECO	TUBA	ecological factor	96
17 ENV+5 Phys+73 ECO	TUBI	ecological factor	96
17 ENV+5 Phys+73 ECO	TURB	ecological factor	96
17 ENV+5 Phys+73 ECO	ZOOP	ecological factor	96
17 ENV+5 Phys+73 ECO	total algal cover	ecological factor	96
17 ENV+5 Phys+73 ECO	coral/algae	ecological factor	96
17 ENV+5 Phys+73 ECO	coral cover	ecological factor	96
95 predictors	Sym assemblage	lab-based physiological factor	95
95 predictors	max length (cm)	in situ physiological factor	95
95 predictors	polyps extended	in situ physiological factor	95
95 predictors	latitude	environmental factor	95
95 predictors	longitude	environmental factor	95
95 predictors	lagoon	environmental factor	95
95 predictors	reef emergence	environmental factor	95
95 predictors	exposure	environmental factor	95
95 predictors	reef location	environmental factor	95
95 predictors	forereef?	environmental factor	95
95 predictors	reef type	environmental factor	95
95 predictors	time-binned	environmental factor	95
95 predictors	night-day	environmental factor	95
95 predictors	temperature (C)	environmental factor	95
95 predictors	salinity	environmental factor	95
95 predictors	PAR	environmental factor	95
95 predictors	depth (m)	environmental factor	95
95 predictors	depth (binned)	environmental factor	95
95 predictors	PB	ecological factor	95
95 predictors	PITS	ecological factor	95
95 predictors	PTSTS	ecological factor	95
95 predictors	PTTS	ecological factor	95
95 predictors	PCCATS	ecological factor	95
95 predictors	PCYTS	ecological factor	95
95 predictors	PETS	ecological factor	95
95 predictors	PMTS	ecological factor	95
95 predictors	ACAN	ecological factor	95
95 predictors	ACRO	ecological factor	95
95 predictors	ALVE	ecological factor	95
95 predictors	ANAC	ecological factor	95
95 predictors	ASTR	ecological factor	95
95 predictors	CATA	ecological factor	95
95 predictors	CAUL	ecological factor	95
95 predictors	COEL	ecological factor	95
95 predictors	COSC	ecological factor	95
95 predictors	CTEN	ecological factor	95
95 predictors	CYPH	ecological factor	95
95 predictors	DIPL	ecological factor	95
95 predictors	ECHN	ecological factor	95
95 predictors	EPHY	ecological factor	95
95 predictors	EUPH	ecological factor	95
95 predictors	FUNG	ecological factor	95
95 predictors	FVIA	ecological factor	95
95 predictors	FVIT	ecological factor	95
95 predictors	GALA	ecological factor	95
95 predictors	GARD	ecological factor	95
95 predictors	GNIA	ecological factor	95
95 predictors	GONI	ecological factor	95
95 predictors	HEFU	ecological factor	95
95 predictors	HALO	ecological factor	95
95 predictors	HELI	ecological factor	95
95 predictors	HELIO	ecological factor	95
95 predictors	HYDN	ecological factor	95
95 predictors	ISOP	ecological factor	95
95 predictors	LOBO	ecological factor	95
95 predictors	LORI	ecological factor	95
95 predictors	LPTO	ecological factor	95
95 predictors	LPTA	ecological factor	95
95 predictors	MERU	ecological factor	95
95 predictors	MILL	ecological factor	95
95 predictors	MNTA	ecological factor	95
95 predictors	MNTI	ecological factor	95
95 predictors	MYCE	ecological factor	95
95 predictors	OXYP	ecological factor	95
95 predictors	PACH	ecological factor	95
95 predictors	PARA	ecological factor	95
95 predictors	PAVO	ecological factor	95
95 predictors	PECT	ecological factor	95
95 predictors	PHYS	ecological factor	95
95 predictors	PLAY	ecological factor	95
95 predictors	PLES	ecological factor	95
95 predictors	PLRO	ecological factor	95
95 predictors	POCI	ecological factor	95
95 predictors	PODA	ecological factor	95
95 predictors	POLY	ecological factor	95
95 predictors	PORI	ecological factor	95
95 predictors	PSAM	ecological factor	95
95 predictors	SAND	ecological factor	95
95 predictors	SCOE	ecological factor	95
95 predictors	SCOL	ecological factor	95
95 predictors	SERI	ecological factor	95
95 predictors	STYL	ecological factor	95
95 predictors	STYS	ecological factor	95
95 predictors	SYMP	ecological factor	95
95 predictors	TRAC	ecological factor	95
95 predictors	TUBA	ecological factor	95
95 predictors	TUBI	ecological factor	95
95 predictors	TURB	ecological factor	95
95 predictors	ZOOP	ecological factor	95
95 predictors	total algal cover	ecological factor	95
95 predictors	coral/algae	ecological factor	95
95 predictors	coral cover	ecological factor	95
95 predictors	coral cover-binned	ecological factor	95
95 predictors	Sum(#genera)	ecological factor	95
95 predictors	Sum(#genera)-binned	ecological factor	95
All ENV+all eco (n=97)	max length (cm)	in situ physiological factor	97
All ENV+all eco (n=97)	planar SA (cm2)	in situ physiological factor	97
All ENV+all eco (n=97)	polyps extended	in situ physiological factor	97
All ENV+all eco (n=97)	Sym assemblage	lab-based physiological factor	97
All ENV+all eco (n=97)	latitude	environmental factor	97
All ENV+all eco (n=97)	longitude	environmental factor	97
All ENV+all eco (n=97)	lagoon	environmental factor	97
All ENV+all eco (n=97)	reef emergence	environmental factor	97
All ENV+all eco (n=97)	island	environmental factor	97
All ENV+all eco (n=97)	exposure	environmental factor	97
All ENV+all eco (n=97)	reef location	environmental factor	97
All ENV+all eco (n=97)	forereef?	environmental factor	97
All ENV+all eco (n=97)	reef type	environmental factor	97
All ENV+all eco (n=97)	time-binned	environmental factor	97
All ENV+all eco (n=97)	night-day	environmental factor	97
All ENV+all eco (n=97)	temperature (C)	environmental factor	97
All ENV+all eco (n=97)	salinity	environmental factor	97
All ENV+all eco (n=97)	PAR	environmental factor	97
All ENV+all eco (n=97)	depth (m)	environmental factor	97
All ENV+all eco (n=97)	depth (binned)	environmental factor	97
All ENV+all eco (n=97)	PB	ecological factor	97
All ENV+all eco (n=97)	PITS	ecological factor	97
All ENV+all eco (n=97)	PTSTS	ecological factor	97
All ENV+all eco (n=97)	PTTS	ecological factor	97
All ENV+all eco (n=97)	PCCATS	ecological factor	97
All ENV+all eco (n=97)	PCYTS	ecological factor	97
All ENV+all eco (n=97)	PETS	ecological factor	97
All ENV+all eco (n=97)	PMTS	ecological factor	97
All ENV+all eco (n=97)	ACAN	ecological factor	97
All ENV+all eco (n=97)	ACRO	ecological factor	97
All ENV+all eco (n=97)	ALVE	ecological factor	97
All ENV+all eco (n=97)	ANAC	ecological factor	97
All ENV+all eco (n=97)	ASTR	ecological factor	97
All ENV+all eco (n=97)	CATA	ecological factor	97
All ENV+all eco (n=97)	CAUL	ecological factor	97
All ENV+all eco (n=97)	COEL	ecological factor	97
All ENV+all eco (n=97)	COSC	ecological factor	97
All ENV+all eco (n=97)	CTEN	ecological factor	97
All ENV+all eco (n=97)	CYPH	ecological factor	97
All ENV+all eco (n=97)	DIPL	ecological factor	97
All ENV+all eco (n=97)	ECHN	ecological factor	97
All ENV+all eco (n=97)	EPHY	ecological factor	97
All ENV+all eco (n=97)	EUPH	ecological factor	97
All ENV+all eco (n=97)	FUNG	ecological factor	97
All ENV+all eco (n=97)	FVIA	ecological factor	97
All ENV+all eco (n=97)	FVIT	ecological factor	97
All ENV+all eco (n=97)	GALA	ecological factor	97
All ENV+all eco (n=97)	GARD	ecological factor	97
All ENV+all eco (n=97)	GNIA	ecological factor	97
All ENV+all eco (n=97)	GONI	ecological factor	97
All ENV+all eco (n=97)	HEFU	ecological factor	97
All ENV+all eco (n=97)	HALO	ecological factor	97
All ENV+all eco (n=97)	HELI	ecological factor	97
All ENV+all eco (n=97)	HELIO	ecological factor	97
All ENV+all eco (n=97)	HYDN	ecological factor	97
All ENV+all eco (n=97)	ISOP	ecological factor	97
All ENV+all eco (n=97)	LOBO	ecological factor	97
All ENV+all eco (n=97)	LORI	ecological factor	97
All ENV+all eco (n=97)	LPTO	ecological factor	97
All ENV+all eco (n=97)	LPTA	ecological factor	97
All ENV+all eco (n=97)	MERU	ecological factor	97
All ENV+all eco (n=97)	MILL	ecological factor	97
All ENV+all eco (n=97)	MNTA	ecological factor	97
All ENV+all eco (n=97)	MNTI	ecological factor	97
All ENV+all eco (n=97)	MYCE	ecological factor	97
All ENV+all eco (n=97)	OXYP	ecological factor	97
All ENV+all eco (n=97)	PACH	ecological factor	97
All ENV+all eco (n=97)	PARA	ecological factor	97
All ENV+all eco (n=97)	PAVO	ecological factor	97
All ENV+all eco (n=97)	PECT	ecological factor	97
All ENV+all eco (n=97)	PHYS	ecological factor	97
All ENV+all eco (n=97)	PLAY	ecological factor	97
All ENV+all eco (n=97)	PLES	ecological factor	97
All ENV+all eco (n=97)	PLRO	ecological factor	97
All ENV+all eco (n=97)	POCI	ecological factor	97
All ENV+all eco (n=97)	PODA	ecological factor	97
All ENV+all eco (n=97)	POLY	ecological factor	97
All ENV+all eco (n=97)	PORI	ecological factor	97
All ENV+all eco (n=97)	PSAM	ecological factor	97
All ENV+all eco (n=97)	SAND	ecological factor	97
All ENV+all eco (n=97)	SCOE	ecological factor	97
All ENV+all eco (n=97)	SCOL	ecological factor	97
All ENV+all eco (n=97)	SERI	ecological factor	97
All ENV+all eco (n=97)	STYL	ecological factor	97
All ENV+all eco (n=97)	STYS	ecological factor	97
All ENV+all eco (n=97)	SYMP	ecological factor	97
All ENV+all eco (n=97)	TRAC	ecological factor	97
All ENV+all eco (n=97)	TUBA	ecological factor	97
All ENV+all eco (n=97)	TUBI	ecological factor	97
All ENV+all eco (n=97)	TURB	ecological factor	97
All ENV+all eco (n=97)	ZOOP	ecological factor	97
All ENV+all eco (n=97)	total algal cover	ecological factor	97
All ENV+all eco (n=97)	coral/algae	ecological factor	97
All ENV+all eco (n=97)	coral cover	ecological factor	97
All ENV+all eco (n=97)	coral cover-binned	ecological factor	97
All ENV+all eco (n=97)	Sum(#genera)	ecological factor	97
All ENV+all eco (n=97)	Sum(#genera)-binned	ecological factor	97
All ENV+all eco (n=96)	max length (cm)	in situ physiological factor	96
All ENV+all eco (n=96)	planar SA (cm2)	in situ physiological factor	96
All ENV+all eco (n=96)	polyps extended	in situ physiological factor	96
All ENV+all eco (n=96)	Sym assemblage	lab-based physiological factor	96
All ENV+all eco (n=96)	latitude	environmental factor	96
All ENV+all eco (n=96)	longitude	environmental factor	96
All ENV+all eco (n=96)	lagoon	environmental factor	96
All ENV+all eco (n=96)	reef emergence	environmental factor	96
All ENV+all eco (n=96)	exposure	environmental factor	96
All ENV+all eco (n=96)	reef location	environmental factor	96
All ENV+all eco (n=96)	forereef?	environmental factor	96
All ENV+all eco (n=96)	reef type	environmental factor	96
All ENV+all eco (n=96)	time-binned	environmental factor	96
All ENV+all eco (n=96)	night-day	environmental factor	96
All ENV+all eco (n=96)	temperature (C)	environmental factor	96
All ENV+all eco (n=96)	salinity	environmental factor	96
All ENV+all eco (n=96)	PAR	environmental factor	96
All ENV+all eco (n=96)	depth (m)	environmental factor	96
All ENV+all eco (n=96)	depth (binned)	environmental factor	96
All ENV+all eco (n=96)	PB	ecological factor	96
All ENV+all eco (n=96)	PITS	ecological factor	96
All ENV+all eco (n=96)	PTSTS	ecological factor	96
All ENV+all eco (n=96)	PTTS	ecological factor	96
All ENV+all eco (n=96)	PCCATS	ecological factor	96
All ENV+all eco (n=96)	PCYTS	ecological factor	96
All ENV+all eco (n=96)	PETS	ecological factor	96
All ENV+all eco (n=96)	PMTS	ecological factor	96
All ENV+all eco (n=96)	ACAN	ecological factor	96
All ENV+all eco (n=96)	ACRO	ecological factor	96
All ENV+all eco (n=96)	ALVE	ecological factor	96
All ENV+all eco (n=96)	ANAC	ecological factor	96
All ENV+all eco (n=96)	ASTR	ecological factor	96
All ENV+all eco (n=96)	CATA	ecological factor	96
All ENV+all eco (n=96)	CAUL	ecological factor	96
All ENV+all eco (n=96)	COEL	ecological factor	96
All ENV+all eco (n=96)	COSC	ecological factor	96
All ENV+all eco (n=96)	CTEN	ecological factor	96
All ENV+all eco (n=96)	CYPH	ecological factor	96
All ENV+all eco (n=96)	DIPL	ecological factor	96
All ENV+all eco (n=96)	ECHN	ecological factor	96
All ENV+all eco (n=96)	EPHY	ecological factor	96
All ENV+all eco (n=96)	EUPH	ecological factor	96
All ENV+all eco (n=96)	FUNG	ecological factor	96
All ENV+all eco (n=96)	FVIA	ecological factor	96
All ENV+all eco (n=96)	FVIT	ecological factor	96
All ENV+all eco (n=96)	GALA	ecological factor	96
All ENV+all eco (n=96)	GARD	ecological factor	96
All ENV+all eco (n=96)	GNIA	ecological factor	96
All ENV+all eco (n=96)	GONI	ecological factor	96
All ENV+all eco (n=96)	HEFU	ecological factor	96
All ENV+all eco (n=96)	HALO	ecological factor	96
All ENV+all eco (n=96)	HELI	ecological factor	96
All ENV+all eco (n=96)	HELIO	ecological factor	96
All ENV+all eco (n=96)	HYDN	ecological factor	96
All ENV+all eco (n=96)	ISOP	ecological factor	96
All ENV+all eco (n=96)	LOBO	ecological factor	96
All ENV+all eco (n=96)	LORI	ecological factor	96
All ENV+all eco (n=96)	LPTO	ecological factor	96
All ENV+all eco (n=96)	LPTA	ecological factor	96
All ENV+all eco (n=96)	MERU	ecological factor	96
All ENV+all eco (n=96)	MILL	ecological factor	96
All ENV+all eco (n=96)	MNTA	ecological factor	96
All ENV+all eco (n=96)	MNTI	ecological factor	96
All ENV+all eco (n=96)	MYCE	ecological factor	96
All ENV+all eco (n=96)	OXYP	ecological factor	96
All ENV+all eco (n=96)	PACH	ecological factor	96
All ENV+all eco (n=96)	PARA	ecological factor	96
All ENV+all eco (n=96)	PAVO	ecological factor	96
All ENV+all eco (n=96)	PECT	ecological factor	96
All ENV+all eco (n=96)	PHYS	ecological factor	96
All ENV+all eco (n=96)	PLAY	ecological factor	96
All ENV+all eco (n=96)	PLES	ecological factor	96
All ENV+all eco (n=96)	PLRO	ecological factor	96
All ENV+all eco (n=96)	POCI	ecological factor	96
All ENV+all eco (n=96)	PODA	ecological factor	96
All ENV+all eco (n=96)	POLY	ecological factor	96
All ENV+all eco (n=96)	PORI	ecological factor	96
All ENV+all eco (n=96)	PSAM	ecological factor	96
All ENV+all eco (n=96)	SAND	ecological factor	96
All ENV+all eco (n=96)	SCOE	ecological factor	96
All ENV+all eco (n=96)	SCOL	ecological factor	96
All ENV+all eco (n=96)	SERI	ecological factor	96
All ENV+all eco (n=96)	STYL	ecological factor	96
All ENV+all eco (n=96)	STYS	ecological factor	96
All ENV+all eco (n=96)	SYMP	ecological factor	96
All ENV+all eco (n=96)	TRAC	ecological factor	96
All ENV+all eco (n=96)	TUBA	ecological factor	96
All ENV+all eco (n=96)	TUBI	ecological factor	96
All ENV+all eco (n=96)	TURB	ecological factor	96
All ENV+all eco (n=96)	ZOOP	ecological factor	96
All ENV+all eco (n=96)	total algal cover	ecological factor	96
All ENV+all eco (n=96)	coral/algae	ecological factor	96
All ENV+all eco (n=96)	coral cover	ecological factor	96
All ENV+all eco (n=96)	coral cover-binned	ecological factor	96
All ENV+all eco (n=96)	Sum(#genera)	ecological factor	96
All ENV+all eco (n=96)	Sum(#genera)-binned	ecological factor	96
All benthic+all ECO minus 4	PB	ecological factor	93
All benthic+all ECO minus 4	PITS	ecological factor	93
All benthic+all ECO minus 4	PTSTS	ecological factor	93
All benthic+all ECO minus 4	PTTS	ecological factor	93
All benthic+all ECO minus 4	PCCATS	ecological factor	93
All benthic+all ECO minus 4	PCYTS	ecological factor	93
All benthic+all ECO minus 4	PETS	ecological factor	93
All benthic+all ECO minus 4	PMTS	ecological factor	93
All benthic+all ECO minus 4	ACAN	ecological factor	93
All benthic+all ECO minus 4	ACRO	ecological factor	93
All benthic+all ECO minus 4	ALVE	ecological factor	93
All benthic+all ECO minus 4	ANAC	ecological factor	93
All benthic+all ECO minus 4	ASTR	ecological factor	93
All benthic+all ECO minus 4	CATA	ecological factor	93
All benthic+all ECO minus 4	CAUL	ecological factor	93
All benthic+all ECO minus 4	COEL	ecological factor	93
All benthic+all ECO minus 4	COSC	ecological factor	93
All benthic+all ECO minus 4	CTEN	ecological factor	93
All benthic+all ECO minus 4	CYPH	ecological factor	93
All benthic+all ECO minus 4	DIPL	ecological factor	93
All benthic+all ECO minus 4	ECHN	ecological factor	93
All benthic+all ECO minus 4	EPHY	ecological factor	93
All benthic+all ECO minus 4	EUPH	ecological factor	93
All benthic+all ECO minus 4	FUNG	ecological factor	93
All benthic+all ECO minus 4	FVIA	ecological factor	93
All benthic+all ECO minus 4	FVIT	ecological factor	93
All benthic+all ECO minus 4	GALA	ecological factor	93
All benthic+all ECO minus 4	GARD	ecological factor	93
All benthic+all ECO minus 4	GNIA	ecological factor	93
All benthic+all ECO minus 4	GONI	ecological factor	93
All benthic+all ECO minus 4	HEFU	ecological factor	93
All benthic+all ECO minus 4	HALO	ecological factor	93
All benthic+all ECO minus 4	HELI	ecological factor	93
All benthic+all ECO minus 4	HELIO	ecological factor	93
All benthic+all ECO minus 4	HYDN	ecological factor	93
All benthic+all ECO minus 4	ISOP	ecological factor	93
All benthic+all ECO minus 4	LOBO	ecological factor	93
All benthic+all ECO minus 4	LORI	ecological factor	93
All benthic+all ECO minus 4	LPTO	ecological factor	93
All benthic+all ECO minus 4	LPTA	ecological factor	93
All benthic+all ECO minus 4	MERU	ecological factor	93
All benthic+all ECO minus 4	MILL	ecological factor	93
All benthic+all ECO minus 4	MNTA	ecological factor	93
All benthic+all ECO minus 4	MNTI	ecological factor	93
All benthic+all ECO minus 4	MYCE	ecological factor	93
All benthic+all ECO minus 4	OXYP	ecological factor	93
All benthic+all ECO minus 4	PACH	ecological factor	93
All benthic+all ECO minus 4	PARA	ecological factor	93
All benthic+all ECO minus 4	PAVO	ecological factor	93
All benthic+all ECO minus 4	PECT	ecological factor	93
All benthic+all ECO minus 4	PHYS	ecological factor	93
All benthic+all ECO minus 4	PLAY	ecological factor	93
All benthic+all ECO minus 4	PLES	ecological factor	93
All benthic+all ECO minus 4	PLRO	ecological factor	93
All benthic+all ECO minus 4	POCI	ecological factor	93
All benthic+all ECO minus 4	PODA	ecological factor	93
All benthic+all ECO minus 4	POLY	ecological factor	93
All benthic+all ECO minus 4	PORI	ecological factor	93
All benthic+all ECO minus 4	PSAM	ecological factor	93
All benthic+all ECO minus 4	SAND	ecological factor	93
All benthic+all ECO minus 4	SCOE	ecological factor	93
All benthic+all ECO minus 4	SCOL	ecological factor	93
All benthic+all ECO minus 4	SERI	ecological factor	93
All benthic+all ECO minus 4	STYL	ecological factor	93
All benthic+all ECO minus 4	STYS	ecological factor	93
All benthic+all ECO minus 4	SYMP	ecological factor	93
All benthic+all ECO minus 4	TRAC	ecological factor	93
All benthic+all ECO minus 4	TUBA	ecological factor	93
All benthic+all ECO minus 4	TUBI	ecological factor	93
All benthic+all ECO minus 4	TURB	ecological factor	93
All benthic+all ECO minus 4	ZOOP	ecological factor	93
All benthic+all ECO minus 4	total algal cover	ecological factor	93
All benthic+all ECO minus 4	coral/algae	ecological factor	93
All benthic+all ECO minus 4	coral cover	ecological factor	93
All benthic+all ECO minus 4	coral cover-binned	ecological factor	93
All benthic+all ECO minus 4	Sum(#genera)	environmental factor	93
All benthic+all ECO minus 4	time-binned	environmental factor	93
All benthic+all ECO minus 4	night-day	environmental factor	93
All benthic+all ECO minus 4	temperature (C)	environmental factor	93
All benthic+all ECO minus 4	salinity	environmental factor	93
All benthic+all ECO minus 4	PAR	environmental factor	93
All benthic+all ECO minus 4	depth (m)	environmental factor	93
All benthic+all ECO minus 4	exposure	environmental factor	93
All benthic+all ECO minus 4	reef location	environmental factor	93
All benthic+all ECO minus 4	forereef?	environmental factor	93
All benthic+all ECO minus 4	reef type	environmental factor	93
All benthic+all ECO minus 4	latitude	environmental factor	93
All benthic+all ECO minus 4	longitude	environmental factor	93
All benthic+all ECO minus 4	lagoon	environmental factor	93
All benthic+all ECO minus 4	reef emergence	environmental factor	93
All benthic+all ECO minus 4	polyps extended	in situ physiological factor	93
All benthic+all ECO minus 4	Sym assemblage	lab-based physiological factor	93
All benthic+all ECO minus 4	max length (cm)	in situ physiological factor	93
Image+19 predictors	Picture	in situ physiological factor	20
Image+19 predictors	depth (binned)	environmental factor	20
Image+19 predictors	island	environmental factor	20
Image+19 predictors	max length (cm)	in situ physiological factor	20
Image+19 predictors	polyps extended	in situ physiological factor	20
Image+19 predictors	Sym assemblage	lab-based physiological factor	20
Image+19 predictors	latitude	environmental factor	20
Image+19 predictors	longitude	environmental factor	20
Image+19 predictors	lagoon	environmental factor	20
Image+19 predictors	reef emergence	environmental factor	20
Image+19 predictors	exposure	environmental factor	20
Image+19 predictors	reef location	environmental factor	20
Image+19 predictors	forereef?	environmental factor	20
Image+19 predictors	reef type	environmental factor	20
Image+19 predictors	time-binned	environmental factor	20
Image+19 predictors	night-day	environmental factor	20
Image+19 predictors	temperature (C)	environmental factor	20
Image+19 predictors	salinity	environmental factor	20
Image+19 predictors	PAR	environmental factor	20
Image+19 predictors	depth (m)	environmental factor	20
Image +99 predictors	Picture	in situ physiological factor	99
Image +99 predictors	depth (binned)	environmental factor	99
Image +99 predictors	island	environmental factor	99
Image +99 predictors	max length (cm)	in situ physiological factor	99
Image +99 predictors	polyps extended	in situ physiological factor	99
Image +99 predictors	Sym assemblage	lab-based physiological factor	99
Image +99 predictors	latitude	environmental factor	99
Image +99 predictors	longitude	environmental factor	99
Image +99 predictors	lagoon	environmental factor	99
Image +99 predictors	reef emergence	environmental factor	99
Image +99 predictors	exposure	environmental factor	99
Image +99 predictors	reef location	environmental factor	99
Image +99 predictors	forereef?	environmental factor	99
Image +99 predictors	reef type	environmental factor	99
Image +99 predictors	time-binned	environmental factor	99
Image +99 predictors	night-day	environmental factor	99
Image +99 predictors	temperature (C)	environmental factor	99
Image +99 predictors	salinity	environmental factor	99
Image +99 predictors	PAR	environmental factor	99
Image +99 predictors	depth (m)	environmental factor	99
Image +99 predictors	PB	ecological factor	99
Image +99 predictors	PITS	ecological factor	99
Image +99 predictors	PTSTS	ecological factor	99
Image +99 predictors	PTTS	ecological factor	99
Image +99 predictors	PCCATS	ecological factor	99
Image +99 predictors	PCYTS	ecological factor	99
Image +99 predictors	PETS	ecological factor	99
Image +99 predictors	PMTS	ecological factor	99
Image +99 predictors	ACAN	ecological factor	99
Image +99 predictors	ACRO	ecological factor	99
Image +99 predictors	ALVE	ecological factor	99
Image +99 predictors	ANAC	ecological factor	99
Image +99 predictors	ASTR	ecological factor	99
Image +99 predictors	CATA	ecological factor	99
Image +99 predictors	CAUL	ecological factor	99
Image +99 predictors	COEL	ecological factor	99
Image +99 predictors	COSC	ecological factor	99
Image +99 predictors	CTEN	ecological factor	99
Image +99 predictors	CYPH	ecological factor	99
Image +99 predictors	DIPL	ecological factor	99
Image +99 predictors	ECHN	ecological factor	99
Image +99 predictors	EPHY	ecological factor	99
Image +99 predictors	EUPH	ecological factor	99
Image +99 predictors	FUNG	ecological factor	99
Image +99 predictors	FVIA	ecological factor	99
Image +99 predictors	FVIT	ecological factor	99
Image +99 predictors	GALA	ecological factor	99
Image +99 predictors	GARD	ecological factor	99
Image +99 predictors	GNIA	ecological factor	99
Image +99 predictors	GONI	ecological factor	99
Image +99 predictors	HEFU	ecological factor	99
Image +99 predictors	HALO	ecological factor	99
Image +99 predictors	HELI	ecological factor	99
Image +99 predictors	HELIO	ecological factor	99
Image +99 predictors	HYDN	ecological factor	99
Image +99 predictors	ISOP	ecological factor	99
Image +99 predictors	LOBO	ecological factor	99
Image +99 predictors	LORI	ecological factor	99
Image +99 predictors	LPTO	ecological factor	99
Image +99 predictors	LPTA	ecological factor	99
Image +99 predictors	MERU	ecological factor	99
Image +99 predictors	MILL	ecological factor	99
Image +99 predictors	MNTA	ecological factor	99
Image +99 predictors	MNTI	ecological factor	99
Image +99 predictors	MYCE	ecological factor	99
Image +99 predictors	OXYP	ecological factor	99
Image +99 predictors	PACH	ecological factor	99
Image +99 predictors	PARA	ecological factor	99
Image +99 predictors	PAVO	ecological factor	99
Image +99 predictors	PECT	ecological factor	99
Image +99 predictors	PHYS	ecological factor	99
Image +99 predictors	PLAY	ecological factor	99
Image +99 predictors	PLES	ecological factor	99
Image +99 predictors	PLRO	ecological factor	99
Image +99 predictors	POCI	ecological factor	99
Image +99 predictors	PODA	ecological factor	99
Image +99 predictors	POLY	ecological factor	99
Image +99 predictors	PORI	ecological factor	99
Image +99 predictors	PSAM	ecological factor	99
Image +99 predictors	SAND	ecological factor	99
Image +99 predictors	SCOE	ecological factor	99
Image +99 predictors	SCOL	ecological factor	99
Image +99 predictors	SERI	ecological factor	99
Image +99 predictors	STYL	ecological factor	99
Image +99 predictors	STYS	ecological factor	99
Image +99 predictors	SYMP	ecological factor	99
Image +99 predictors	TRAC	ecological factor	99
Image +99 predictors	TUBA	ecological factor	99
Image +99 predictors	TUBI	ecological factor	99
Image +99 predictors	TURB	ecological factor	99
Image +99 predictors	ZOOP	ecological factor	99
Image +99 predictors	coral cover	ecological factor	99
Image +99 predictors	coral cover-binned	ecological factor	99
Image +99 predictors	total algal cover	ecological factor	99
Image +99 predictors	coral/algae	ecological factor	99
Image +99 predictors	Sum(#genera)	ecological factor	99
Image +99 predictors	Sum(#genera)-binned	ecological factor	99
Image +99 predictors	Shannon diversity	ecological factor	99
Image +99 predictors	evenness	ecological factor	99
Most ENV+all ECO+multivariate	max length (cm)	in situ physiological factor	103
Most ENV+all ECO+multivariate	polyps extended	in situ physiological factor	103
Most ENV+all ECO+multivariate	Sym assemblage	lab-based physiological factor	103
Most ENV+all ECO+multivariate	latitude	environmental factor	103
Most ENV+all ECO+multivariate	longitude	environmental factor	103
Most ENV+all ECO+multivariate	lagoon	environmental factor	103
Most ENV+all ECO+multivariate	reef emergence	environmental factor	103
Most ENV+all ECO+multivariate	exposure	environmental factor	103
Most ENV+all ECO+multivariate	reef location	environmental factor	103
Most ENV+all ECO+multivariate	forereef?	environmental factor	103
Most ENV+all ECO+multivariate	reef type	environmental factor	103
Most ENV+all ECO+multivariate	temperature (C)	environmental factor	103
Most ENV+all ECO+multivariate	salinity	environmental factor	103
Most ENV+all ECO+multivariate	PAR	environmental factor	103
Most ENV+all ECO+multivariate	depth (m)	environmental factor	103
Most ENV+all ECO+multivariate	depth (binned)	environmental factor	103
Most ENV+all ECO+multivariate	PB	ecological factor	103
Most ENV+all ECO+multivariate	PITS	ecological factor	103
Most ENV+all ECO+multivariate	PTSTS	ecological factor	103
Most ENV+all ECO+multivariate	PTTS	ecological factor	103
Most ENV+all ECO+multivariate	PCCATS	ecological factor	103
Most ENV+all ECO+multivariate	PCYTS	ecological factor	103
Most ENV+all ECO+multivariate	PETS	ecological factor	103
Most ENV+all ECO+multivariate	PMTS	ecological factor	103
Most ENV+all ECO+multivariate	ACAN	ecological factor	103
Most ENV+all ECO+multivariate	ACRO	ecological factor	103
Most ENV+all ECO+multivariate	ALVE	ecological factor	103
Most ENV+all ECO+multivariate	ANAC	ecological factor	103
Most ENV+all ECO+multivariate	ASTR	ecological factor	103
Most ENV+all ECO+multivariate	CATA	ecological factor	103
Most ENV+all ECO+multivariate	CAUL	ecological factor	103
Most ENV+all ECO+multivariate	COEL	ecological factor	103
Most ENV+all ECO+multivariate	COSC	ecological factor	103
Most ENV+all ECO+multivariate	CTEN	ecological factor	103
Most ENV+all ECO+multivariate	CYPH	ecological factor	103
Most ENV+all ECO+multivariate	DIPL	ecological factor	103
Most ENV+all ECO+multivariate	ECHN	ecological factor	103
Most ENV+all ECO+multivariate	EPHY	ecological factor	103
Most ENV+all ECO+multivariate	EUPH	ecological factor	103
Most ENV+all ECO+multivariate	FUNG	ecological factor	103
Most ENV+all ECO+multivariate	FVIA	ecological factor	103
Most ENV+all ECO+multivariate	FVIT	ecological factor	103
Most ENV+all ECO+multivariate	GALA	ecological factor	103
Most ENV+all ECO+multivariate	GARD	ecological factor	103
Most ENV+all ECO+multivariate	GNIA	ecological factor	103
Most ENV+all ECO+multivariate	GONI	ecological factor	103
Most ENV+all ECO+multivariate	HEFU	ecological factor	103
Most ENV+all ECO+multivariate	HALO	ecological factor	103
Most ENV+all ECO+multivariate	HELI	ecological factor	103
Most ENV+all ECO+multivariate	HELIO	ecological factor	103
Most ENV+all ECO+multivariate	HYDN	ecological factor	103
Most ENV+all ECO+multivariate	ISOP	ecological factor	103
Most ENV+all ECO+multivariate	LOBO	ecological factor	103
Most ENV+all ECO+multivariate	LORI	ecological factor	103
Most ENV+all ECO+multivariate	LPTO	ecological factor	103
Most ENV+all ECO+multivariate	LPTA	ecological factor	103
Most ENV+all ECO+multivariate	MERU	ecological factor	103
Most ENV+all ECO+multivariate	MILL	ecological factor	103
Most ENV+all ECO+multivariate	MNTA	ecological factor	103
Most ENV+all ECO+multivariate	MNTI	ecological factor	103
Most ENV+all ECO+multivariate	MYCE	ecological factor	103
Most ENV+all ECO+multivariate	OXYP	ecological factor	103
Most ENV+all ECO+multivariate	PACH	ecological factor	103
Most ENV+all ECO+multivariate	PARA	ecological factor	103
Most ENV+all ECO+multivariate	PAVO	ecological factor	103
Most ENV+all ECO+multivariate	PECT	ecological factor	103
Most ENV+all ECO+multivariate	PHYS	ecological factor	103
Most ENV+all ECO+multivariate	PLAY	ecological factor	103
Most ENV+all ECO+multivariate	PLES	ecological factor	103
Most ENV+all ECO+multivariate	PLRO	ecological factor	103
Most ENV+all ECO+multivariate	POCI	ecological factor	103
Most ENV+all ECO+multivariate	PODA	ecological factor	103
Most ENV+all ECO+multivariate	POLY	ecological factor	103
Most ENV+all ECO+multivariate	PORI	ecological factor	103
Most ENV+all ECO+multivariate	PSAM	ecological factor	103
Most ENV+all ECO+multivariate	SAND	ecological factor	103
Most ENV+all ECO+multivariate	SCOE	ecological factor	103
Most ENV+all ECO+multivariate	SCOL	ecological factor	103
Most ENV+all ECO+multivariate	SERI	ecological factor	103
Most ENV+all ECO+multivariate	STYL	ecological factor	103
Most ENV+all ECO+multivariate	STYS	ecological factor	103
Most ENV+all ECO+multivariate	SYMP	ecological factor	103
Most ENV+all ECO+multivariate	TRAC	ecological factor	103
Most ENV+all ECO+multivariate	TUBA	ecological factor	103
Most ENV+all ECO+multivariate	TUBI	ecological factor	103
Most ENV+all ECO+multivariate	TURB	ecological factor	103
Most ENV+all ECO+multivariate	ZOOP	ecological factor	103
Most ENV+all ECO+multivariate	total algal cover	ecological factor	103
Most ENV+all ECO+multivariate	coral/algae	ecological factor	103
Most ENV+all ECO+multivariate	coral cover	ecological factor	103
Most ENV+all ECO+multivariate	coral cover-binned	ecological factor	103
Most ENV+all ECO+multivariate	Sum(#genera)	ecological factor	103
Most ENV+all ECO+multivariate	Sum(#genera)-binned	ecological factor	103
Most ENV+all ECO+multivariate	Dimension 1	multivariate-physiology	103
Most ENV+all ECO+multivariate	Dimension 2	multivariate-physiology	103
Most ENV+all ECO+multivariate	Dimension 3	multivariate-physiology	103
Most ENV+all ECO+multivariate	Dimension 4	multivariate-physiology	103
Most ENV+all ECO+multivariate	Dimension 1 2	multivariate-ecology	103
Most ENV+all ECO+multivariate	Dimension 2 2	multivariate-ecology	103
Most ENV+all ECO+multivariate	Dimension 3 2	multivariate-ecology	103
Most ENV+all ECO+multivariate	Dimension 4 2	multivariate-ecology	103
Most ENV+all ECO+multivariate	Dimension 5	multivariate-ecology	103
Most ENV+all ECO+multivariate	Dimension 6	multivariate-ecology	103
Univariate+multivariate predictors	PB	ecological factor	111
Univariate+multivariate predictors	PITS	ecological factor	111
Univariate+multivariate predictors	PTSTS	ecological factor	111
Univariate+multivariate predictors	PTTS	ecological factor	111
Univariate+multivariate predictors	PCCATS	ecological factor	111
Univariate+multivariate predictors	PCYTS	ecological factor	111
Univariate+multivariate predictors	PETS	ecological factor	111
Univariate+multivariate predictors	PMTS	ecological factor	111
Univariate+multivariate predictors	ACAN	ecological factor	111
Univariate+multivariate predictors	ACRO	ecological factor	111
Univariate+multivariate predictors	ALVE	ecological factor	111
Univariate+multivariate predictors	ANAC	ecological factor	111
Univariate+multivariate predictors	ASTR	ecological factor	111
Univariate+multivariate predictors	CATA	ecological factor	111
Univariate+multivariate predictors	CAUL	ecological factor	111
Univariate+multivariate predictors	COEL	ecological factor	111
Univariate+multivariate predictors	COSC	ecological factor	111
Univariate+multivariate predictors	CTEN	ecological factor	111
Univariate+multivariate predictors	CYPH	ecological factor	111
Univariate+multivariate predictors	DIPL	ecological factor	111
Univariate+multivariate predictors	ECHN	ecological factor	111
Univariate+multivariate predictors	EPHY	ecological factor	111
Univariate+multivariate predictors	EUPH	ecological factor	111
Univariate+multivariate predictors	FUNG	ecological factor	111
Univariate+multivariate predictors	FVIA	ecological factor	111
Univariate+multivariate predictors	FVIT	ecological factor	111
Univariate+multivariate predictors	GALA	ecological factor	111
Univariate+multivariate predictors	GARD	ecological factor	111
Univariate+multivariate predictors	GNIA	ecological factor	111
Univariate+multivariate predictors	GONI	ecological factor	111
Univariate+multivariate predictors	HEFU	ecological factor	111
Univariate+multivariate predictors	HALO	ecological factor	111
Univariate+multivariate predictors	HELI	ecological factor	111
Univariate+multivariate predictors	HELIO	ecological factor	111
Univariate+multivariate predictors	HYDN	ecological factor	111
Univariate+multivariate predictors	ISOP	ecological factor	111
Univariate+multivariate predictors	LOBO	ecological factor	111
Univariate+multivariate predictors	LORI	ecological factor	111
Univariate+multivariate predictors	LPTO	ecological factor	111
Univariate+multivariate predictors	LPTA	ecological factor	111
Univariate+multivariate predictors	MERU	ecological factor	111
Univariate+multivariate predictors	MILL	ecological factor	111
Univariate+multivariate predictors	MNTA	ecological factor	111
Univariate+multivariate predictors	MNTI	ecological factor	111
Univariate+multivariate predictors	MYCE	ecological factor	111
Univariate+multivariate predictors	OXYP	ecological factor	111
Univariate+multivariate predictors	PACH	ecological factor	111
Univariate+multivariate predictors	PARA	ecological factor	111
Univariate+multivariate predictors	PAVO	ecological factor	111
Univariate+multivariate predictors	PECT	ecological factor	111
Univariate+multivariate predictors	PHYS	ecological factor	111
Univariate+multivariate predictors	PLAY	ecological factor	111
Univariate+multivariate predictors	PLES	ecological factor	111
Univariate+multivariate predictors	PLRO	ecological factor	111
Univariate+multivariate predictors	POCI	ecological factor	111
Univariate+multivariate predictors	PODA	ecological factor	111
Univariate+multivariate predictors	POLY	ecological factor	111
Univariate+multivariate predictors	PORI	ecological factor	111
Univariate+multivariate predictors	PSAM	ecological factor	111
Univariate+multivariate predictors	SAND	ecological factor	111
Univariate+multivariate predictors	SCOE	ecological factor	111
Univariate+multivariate predictors	SCOL	ecological factor	111
Univariate+multivariate predictors	SERI	ecological factor	111
Univariate+multivariate predictors	STYL	ecological factor	111
Univariate+multivariate predictors	STYS	ecological factor	111
Univariate+multivariate predictors	SYMP	ecological factor	111
Univariate+multivariate predictors	TRAC	ecological factor	111
Univariate+multivariate predictors	TUBA	ecological factor	111
Univariate+multivariate predictors	TUBI	ecological factor	111
Univariate+multivariate predictors	TURB	ecological factor	111
Univariate+multivariate predictors	ZOOP	ecological factor	111
Univariate+multivariate predictors	total algal cover	ecological factor	111
Univariate+multivariate predictors	coral/algae	ecological factor	111
Univariate+multivariate predictors	coral cover	ecological factor	111
Univariate+multivariate predictors	coral cover-binned	ecological factor	111
Univariate+multivariate predictors	Sum(#genera)	ecological factor	111
Univariate+multivariate predictors	Sum(#genera)-binned	ecological factor	111
Univariate+multivariate predictors	T²	multivariate-physiology	111
Univariate+multivariate predictors	Dimension 1	multivariate-physiology	111
Univariate+multivariate predictors	Dimension 2	multivariate-physiology	111
Univariate+multivariate predictors	Dimension 3	multivariate-physiology	111
Univariate+multivariate predictors	Dimension 4	multivariate-physiology	111
Univariate+multivariate predictors	T² 2	multivariate-ecology	111
Univariate+multivariate predictors	Prin1	multivariate-ecology	111
Univariate+multivariate predictors	Prin2	multivariate-ecology	111
Univariate+multivariate predictors	Dimension 1 2	multivariate-ecology	111
Univariate+multivariate predictors	Dimension 2 2	multivariate-ecology	111
Univariate+multivariate predictors	Dimension 3 2	multivariate-ecology	111
Univariate+multivariate predictors	Dimension 4 2	multivariate-ecology	111
Univariate+multivariate predictors	Dimension 5	multivariate-ecology	111
Univariate+multivariate predictors	Dimension 6	multivariate-ecology	111
Univariate+multivariate predictors	Sym assemblage	lab-based physiological factor	111
Univariate+multivariate predictors	max length (cm)	in situ physiological factor	111
Univariate+multivariate predictors	planar SA (cm2)	in situ physiological factor	111
Univariate+multivariate predictors	polyps extended	in situ physiological factor	111
Univariate+multivariate predictors	polyps extended (cont)	in situ physiological factor	111
Univariate+multivariate predictors	latitude	environmental factor	111
Univariate+multivariate predictors	longitude	environmental factor	111
Univariate+multivariate predictors	lagoon	environmental factor	111
Univariate+multivariate predictors	reef emergence	environmental factor	111
Univariate+multivariate predictors	exposure	environmental factor	111
Univariate+multivariate predictors	reef location	environmental factor	111
Univariate+multivariate predictors	forereef?	environmental factor	111
Univariate+multivariate predictors	reef type	environmental factor	111
Univariate+multivariate predictors	time-binned	environmental factor	111
Univariate+multivariate predictors	night-day	environmental factor	111
Univariate+multivariate predictors	temperature (C)	environmental factor	111
Univariate+multivariate predictors	salinity	environmental factor	111
Univariate+multivariate predictors	PAR	environmental factor	111
Univariate+multivariate predictors	depth (m)	environmental factor	111
Univariate+multivariate predictors	depth (binned)	environmental factor	111

## Sheet: all 150 samples
									morning=<10:00, midday=10:00-14:00, afternoon=14:00-18:30, night=>18:30					PAR=photosynthetically active radiation					1=very sickly, 5=fully pigmented	note that biopsy phenotype could differ from the appearance of the entire colony				Sym=symbiodiniaceae		GCP=genome copy proportion (a molecular proxy for endosymbiont density)										an exogenous RNA spike	copper-zinc superoxide dismutase	green fluorescent protein-like chromoprotein	ubiquitin ligase	heat shock protein 90		katG=catalase-peroxidase		zinc-induced facilitator-like 1-like
sample	site	site description	collection date	latitude	longitude	exposure	reef type	reef location	lagoon	emergent vs. submergent	time-binned	temperature	salinity	PAR (umol m-2 s-1)	depth (m)	depth (binned)	actual species	polyps extended?	colony phenotype (1-5)	biopsy phenotype	max length (cm)	planar SA (cm2)	% of colony bleached/dead	Sym assemblage	RNA/DNA	Symbiodiniaceae GCP 1/E^Ct	Symbiodiniaceae GCP *10^9	Symbiodiniaceae GCP	host GCP	host GCP *10^9	Cladocopium GCP*10^9	Symbiodinium 1/E^Ct	Symbiodinium GCP*10^9	Durusdinium 1/E^Ct	Durusdinium GCP*10^9	Solaris x10^9	normalized host cu-zn-sod	normalized host gfp-cp	normalized Sym ubiq-lig	normalized Sym hsp90	normalized host cytochrome p450	normalized Sym katG	normalized host catalase	normalized Sym zifl1l	Standardized(normalized host gfp-cp)	Standardized(normalized host cu-zn-sod)	Standardized(normalized Sym ubiq-lig)	Standardized(normalized Sym hsp90)	Standardized(normalized host cytochrome p450)
PaPd18.1-2	PaUl11-day	Ulong back reef	2015-01-13	7.2962	134.258	protected	patch reef	back reef	inside	emergent	midday	28.5	33.8	23	9	5 — 10	P. acuta	yes	4	healthy			0	D w/residual A+C	2.38095	1.04537e-09	1.04537	0.141135	99.8589	739.643	0.673937	3.16898e-09	3.16898	1.40136e-07	140.136
PaPd18.3 (night)	PaUl11-night	Ulong back reef	2015-01-13	7.2962	134.258	protected	patch reef	back reef	inside	emergent	night			0	9	5 — 10	P. acuta		4	healthy			0	D w/residual A+C	0.46875	2.45778e-09	2.45778	0.083004	99.917	2958.57	0.071662	3.47582e-09	3.47582	6.1482e-07	614.82	13.5857	0.179599	0.068846		0.22129	0.00793723	0.0104816	0.6254	4.06712	-0.411359	-0.65225		-0.687207	-0.772789
PaPd19-day	PaUl11-day	Ulong back reef	2015-01-13	7.2962	134.258	protected	patch reef	back reef	inside	emergent	midday	28.5	33.8	32	9.2	5 — 10	P. acuta	yes	2	bleached	15	79	50	D w/residual A+C	2.72941	1.86265e-09	1.86265	0.0387399	99.9613	4806.22	1.8201	3.6402e-09	3.6402	8.49627e-07	849.627	0.119136	0.0634966	0.278578		1.2805	0.0107178	7.58616	0.46313	76.4637	-0.395389	-0.76159		-0.551736	-0.764292
PaPd19.3 (night)	PaUl11-night	Ulong back reef	2015-01-13	7.2962	134.258	protected	patch reef	back reef	inside	emergent	night			0	9.2	5 — 10	P. acuta		2	bleached	15	79	50	D w/residual A+C	1.28077	2.69575e-09	2.69575	0.097561	99.9024	2760.45	0.164636	3.81236e-09	3.81236	8.8981e-07	889.81	13.2754	0.272223	0.0746453	0.0182523	2.0814	0.029623	0.015172	1.14039		-0.410918	-0.565021	-0.281412	-0.449303	-0.706521
PaPd20.1-2	PaUl11-day	Ulong back reef	2015-01-13	7.2962	134.258	protected	patch reef	back reef	inside	emergent	midday	28.5	33.8	28	9.7	5 — 10	P. acuta	yes	4	pale	11	79	0	D w/residual A+C	0.701005	1.17339e-09	1.17339	0.137916	99.8621	849.627	0.066863	6.26517e-09	6.26517	3.29474e-07	329.474	8.17198	0.970216	1.19448	0.025823	8.32895	0.206333	0.0186864	0.0324954	121.499	-0.325646	0.0923188	-0.276013	0.349746	-0.166529
PaPd20.3 (night)	PaUl11-night	Ulong back reef	2015-01-13	7.2962	134.258	protected	patch reef	back reef	inside	emergent	night			0	9.7	5 — 10	P. acuta		4	pale	11	79	0	D w/residual A+C	0.678873	2.043e-09	2.043	0.120085	99.8799	1699.25	0.0842422	1.73791e-09	1.73791	2.93528e-07	293.528	6.95164	0.393994	5.61614	0.100915	6.16689	0.735219	0.485612	3.88051	351.621	0.0110497	-0.450342	-0.222467	0.0732233	1.44965
PaPd21.1-2	PaUl11-day	Ulong back reef	2015-01-13	7.2962	134.258	protected	patch reef	back reef	inside	emergent	midday	28.5	33.8	28	10.1	10 — 15	P. acuta	yes	5	healthy	27	220	0	D w/residual A+C	1.92857	1.69822e-09	1.69822	0.0455375	99.9545	3727.57	0.130672	3.39643e-09	3.39643	1.31789e-06	1317.89	0.153611		0.0540147	10.2447		0.0100001	1.11481	1.50472		-0.412489		7.01075		-0.766485
PaPd21.3 (night)	PaUl11-night	Ulong back reef	2015-01-13	7.2962	134.258	protected	patch reef	back reef	inside	emergent	night			0	10.1	10 — 15	P. acuta		5	healthy	27	220	0	D w/residual A+C	1.15728	2.34679e-09	2.34679	0.0792587	99.9207	2958.57	0.396123	3.02588e-09	3.02588	1.77962e-06	1779.62	5.26836	0.905121	1.30995	0.0252184	15.8963	0.41261	0.367875	3.22548		-0.316853	0.031015	-0.276444	1.3176	0.463814
PaPd22.1-2	PaUl11-day	Ulong back reef	2015-01-13	7.2962	134.258	protected	patch reef	back reef	inside	emergent	midday	28.5	33.8	42	9.7	5 — 10	P. acuta	yes	3	pale	27	328	0	D w/residual A+C	0.685714	2.07429e-10	0.207429	0.0244081	99.9756	849.627	0.0978932	1.58449e-09	1.58449	8.04871e-08	80.4871	6.63771	1.47038	7.94209	0.0364778	4.56252	0.136111	0.22116	7.94209	463.523	0.188163	0.563348	-0.268416	-0.131973	-0.381115
PaPd22.3 (night)	PaUl11-night	Ulong back reef	2015-01-13	7.2962	134.258	protected	patch reef	back reef	inside	emergent	night			0	9.7	5 — 10	P. acuta		3	pale	27	328	0	D w/residual A+C	1.82692	1.95074e-09	1.95074	0.0706175	99.9294	2760.45	0.168484	1.00609e-08	10.0609	3.39851e-06	3398.51
PaPd23-day	PaUl11-day	Ulong back reef	2015-01-13	7.2962	134.258	protected	patch reef	back reef	inside	emergent	midday	28.5	33.8	42	10.1	10 — 15	P. acuta	yes	5	healthy	21	221	0	D w/residual A+C	0.901775	2.13962e-09	2.13962	0.0614818	99.9385	3477.95	0.071662	2.18963e-09	2.18963	2.67616e-07	267.616	7.80295	0.947919	7.58335	0.00615951	7.76524	0.201591	0.403423	6.756	655.763	0.160847	0.0713206	-0.290035	0.277649	-0.181019
PaPd23.3 (night)	PaUl11-night	Ulong back reef	2015-01-13	7.2962	134.258	protected	patch reef	back reef	inside	emergent	night			0	10.1	10 — 15	P. acuta		5	healthy	21	221	0	D w/residual A+C	0.509474	1.8201e-09	1.8201	0.106997	99.893	1699.25	0.103714	7.39191e-10	0.739191	7.9273e-07	792.73	4.91555	0.67031	0.118495	0.118615	7.95037	0.196996	0.0195641	2.50169	27.6848	-0.407579	-0.190119	-0.209846	0.301326	-0.195062
PaPd24-day	PaUl11-day	Ulong back reef	2015-01-13	7.2962	134.258	protected	patch reef	back reef	inside	emergent	midday	28.5	33.8	37	10	10 — 15	P. acuta	yes	5	healthy			0	D w/residual A+C	0.371429	1.8201e-09	1.8201	0.0353212	99.9647	5151.18	0.255374	4.1815e-09	4.1815	2.57559e-06	2575.59	0.0506727	0.0763879	0.412601		5.74904	0.00775578	51.0316	2.50155	422.65	-0.385183	-0.74945		0.0197803	-0.773343
PaPd24.3 (night)	PaUl11-night	Ulong back reef	2015-01-13	7.2962	134.258	protected	patch reef	back reef	inside	emergent	night			0	10	10 — 15	P. acuta		5	healthy			0	D w/residual A+C	0.480514	1.37938e-09	1.37938	0.0499445	99.9501	2760.45	0.121921	3.39643e-09	3.39643	9.75965e-07	975.965	7.62473	0.196987	0.583513	0.363543	17.0323	0.103151	0.412805	1.43678		-0.372169	-0.635875	-0.0351949	1.46288	-0.481832
PaPd25.1-2	PaUl11-day	Ulong back reef	2015-01-13	7.2962	134.258	protected	patch reef	back reef	inside	emergent	midday	28.5	33.8	32	10.5	10 — 15	P. acuta	yes	4	pale	19	185	0	D w/residual A+C	1.72	5.86696e-10	0.586696	0.0314689	99.9685	1863.78	0.153611	2.69575e-09	2.69575	1.84911e-07	184.911	0.0384027	2.33405	2.03191	7.15986	5.24132	0.403182	35.2593	7.41014	2129.94	-0.261878	1.37672	4.81106	-0.0451551	0.435004
PaPd25.3 (night)	PaUl11-night	Ulong back reef	2015-01-13	7.2962	134.258	protected	patch reef	back reef	inside	emergent	night			0	10.5	10 — 15	P. acuta		4	pale	19	185	0	.	0.446061	1.52401e-11				68.4678	0					1.44462
PaPd26	PaUl13	Babeltheop, west barrier reef	2015-01-21	7.3423	134.259	exposed	barrier reef	fore reef	outside	emergent	midday	28.3	34	110	10.6	10 — 15	P. acuta	yes	5	fluorescent	12	74	0	C w/residual A	0.366667	1.40136e-07	140.136	9.61133	90.3887	1317.89	7629.39	5.03045e-09	5.03045	3.63798e-12	0.00363798
PaPd27	PaUl14	Ulong forereef	2015-01-14	7.2505	134.239	exposed	barrier reef	fore reef	outside	emergent	midday	28.4	33.9	55	26.4	25 — 30	P. acuta	yes	5	healthy	13	84	0	C w/residual A	0.460345	2.55531e-07	255.531	6.41537	93.5846	3727.57	14910.3	4.27923e-09	4.27923	9.16713e-12	0.00916713	16.344	0.175794	1.94346	0.12661	1.50018	0.0528712	9.74819	3.08504	2.73549	-0.268614	-0.655834	-0.204145	-0.523639	-0.635479
PaPd28	PaUl14	Ulong forereef	2015-01-14	7.2505	134.239	exposed	barrier reef	fore reef	outside	emergent	midday	28.4	33.9	60	20	20 — 25	P. acuta	no	4	pale	10	31	7.5	C w/residual A	0.377528	8.42937e-08	84.2937	2.77021	97.2298	2958.57	6641.77	2.24081e-09	2.24081	4.0219e-11	0.040219	5.91353	1.22334	8.32525	0.614154	10.7779	0.3203	28.4431	4.67239		0.21734	0.330702	0.143509	0.662964	0.181732
PaPd29	PaUl16	Ulong channel	2015-01-15	7.2836	134.245	intermediate	fringing reef	fore reef	outside	emergent	morning	28.5	33.9	19	24	20 — 25	P. acuta	yes	4	pale	18	100	0	D w/residual A+C	1.67059	4.99083e-10	0.499083	0.0614818	99.9385	811.259	0.0595682	4.58637e-09	4.58637	3.61375e-07	361.375	17.517	0.0409381	0.0240623		0.00871086	0.0035358	0.00891447	0.0224509		-0.414769	-0.782835		-0.714395	-0.786239
PaPd30	PaUl16	Ulong channel	2015-01-15	7.2836	134.245	intermediate	fringing reef	fore reef	outside	emergent	morning	28.5	33.9	37	20	20 — 25	P. acuta	yes	5	healthy	13	88	0	D w/residual A+C	1.07143	4.48162e-09	4.48162	0.288442	99.7116	1549.25	0.280101	2.57401e-09	2.57401	2.49694e-07	249.694	0.0241922	0.570281	1.47061		1.22573	0.32006	4.5746	21.954		-0.304619	-0.284322		-0.55874	0.180999
PaPd31	PaUl16	Ulong channel	2015-01-15	7.2836	134.245	intermediate	fringing reef	fore reef	outside	emergent	morning	28.5	33.9		15.5	15 — 20	P. acuta	some	2	bleached	12.5	72	60	C w/ residual A+D	0.676829	5.43429e-08	54.3429	2.77021	97.2298	1907.35	629.19	4.27923e-09	4.27923	8.68955e-10	0.868955	5.03045	0.719419	1.11592	0.829323	2.88787	0.11595	11.8215	1.31182	80.4492	-0.331628	-0.143871	0.29694	-0.346156	-0.442723
PaPd32	PaUl17	South of Ulong channel	2015-01-15	7.2659	134.246	intermediate	fringing reef	fore reef	outside	emergent	midday	26.9	34.2	179	10.7	10 — 15	P. acuta	yes	5	fluorescent	13	90	0	C w/residual A	1.98462	9.6828e-08	96.828	4.83131	95.1687	1907.35	3320.89	1.18703e-09	1.18703	9.60068e-12	0.00960068	11.5569	0.808392	54.1839	0.0290413	1.50969	0.343836	3.31173	2.28648	13.5566	3.70933	-0.0600802	-0.273718	-0.522423	0.253656
PaPd33	PaUl17	South of Ulong channel	2015-01-15	7.2659	134.246	intermediate	fringing reef	fore reef	outside	emergent	midday	26.9	34.2	335	6.5	5 — 10	P. acuta	no	5	healthy	9	42	0	D w/residual A+C	3.82857	1.41162e-09	1.41162	0.0499445	99.9501	2824.97	0.280101	3.16898e-09	3.16898	1.53705e-07	153.705	17.517	0.201591	0.0190972	0.032133	0.0528067	0.0109684	0.0303295	0.226278	12.908	-0.415147	-0.631539	-0.271514	-0.708755	-0.763526
PaPd34	PaPl18	Olngenaol	2015-01-16	7.0626	134.249	intermediate	fringing reef	fore reef	outside	emergent	morning	28.6	34	42	25	25 — 30	P. acuta	yes	5	healthy	7	29	0	C w/ residual A+D	0.458427	1.01407e-07	101.407	5.16018	94.8398	1863.78	7118.48	3.99267e-09	3.99267	1.33808e-07	133.808	3.39643	1.06693	8.34049	0.124935	4.80958	0.216654	12.4027	2.23478	34.2788	0.2185	0.1834	-0.20534	-0.100374	-0.134989
PaPd35.2	PaPl18	Back reef near Aiwakoko channel	2015-01-24	7.0626	134.249	intermediate	fringing reef	fore reef	outside	emergent	midday	28.6	34	124	9.5	5 — 10	P. acuta	yes	4	pale	29	334	0	D w/residual A+C	0.655507	2.24081e-09	2.24081	0.0674307	99.9326	3320.89	0.361154	2.82324e-09	2.82324	2.09203e-06	2092.03	13.2754	0.0257879	0.0578919	0.069691	0.0620877	0.00587786	0.0193318	0.0649815	10.2469	-0.412193	-0.797103	-0.244732	-0.707568	-0.779082
PaPd36	PaPl19	South of German Channel	2015-01-16	7.0827	134.262	intermediate	fringing reef	fore reef	outside	emergent	midday	28.6	34	55	24.9	20 — 25	P. acuta	yes	5	healthy	10	56	0	C w/residual A	1.30588	1.21996e-07	121.996	6.14346	93.8565	1863.78	7118.48	6.05175e-09	6.05175	7.27596e-12	0.00727596
PaPd37.2	PaPl19	South of German Channel	2015-01-16	7.0827	134.262	intermediate	fringing reef	fore reef	outside	emergent	midday	28.6	34	184	14.5	10 — 15	P. acuta		5	healthy	8	35	0	D w/residual A+C	0.579661	3.39643e-09	3.39643	0.10217	99.8978	3320.89	5.3915	2.88923e-09	2.88923	5.11061e-07	511.061	2.57401	0.992763	7.94211	0.313011	20.9801	0.73519	4.0679	1.37191	442.935	0.188165	0.113553	-0.0712278	1.9678	1.44956
PaPd38	PaPl22	Desomel	2015-01-17	7.1722	134.22	exposed	barrier reef	fore reef	outside	emergent	midday	27.6	34.2	28	29.7	25 — 30	P. acuta	yes	5	healthy	15	91	0	C w/residual A	0.875676	5.82433e-08	58.2433	6.01158	93.9884	910.608	2190.97	4.1815e-09	4.1815			8.96323	0.674693	2.73013	0.0027537	0.696851	0.0156139	0.214481	0.811673		-0.208711	-0.185992	-0.292463	-0.626383	-0.74933
PaPd39	PaPl22	Desomel	2015-01-17	7.1722	134.22	exposed	barrier reef	fore reef	outside	emergent	midday	27.6	34.2	69	25.5	25 — 30	P. acuta	yes	5	healthy			0	C w/residual A	1.25373	1.33808e-07	133.808	6.41537	93.5846	1951.93	6055.45	3.99267e-09	3.99267	1.69718e-12	0.00169718	8.75851	1.40855	4.68336	0.0245489	1.39972	0.143012	0.451188	2.34168	2.02577	-0.0599785	0.505123	-0.276922	-0.536488	-0.360025
PaPd40	PaPl22	Desomel	2015-01-17	7.1722	134.22	exposed	barrier reef	fore reef	outside	emergent	midday	27.6	34.2	124	19.8	15 — 20	P. acuta	yes	4	pale	4	9	10	C w/residual A	0.549057	6.38827e-08	63.8827	3.96017	96.0398	1549.25	2760.45	3.24305e-09	3.24305			11.293	0.00147319	0.0141783	7.58989e-05	0.00139496	0.00512995	0.000191253	0.0296977	0.219827	-0.415522	-0.820001	-0.294373	-0.715331	-0.781367
PaPd41	PaCg23	Coral Gardens	2015-01-17	7.11814	134.271	exposed	patch reef	fore reef	outside	emergent	afternoon	28.8	33.9	19	30	≥ 30	P. acuta	yes	5	healthy	12	72	0	C w/residual A	0.636641	2.55531e-07	255.531	7.61862	92.3814	3098.5	7118.48	5.0889e-09	5.0889	4.95153e-11	0.0495153	12.1035	0.26056	0.13028	0.631623	3.91896	0.116066	27.2932	3.5464		-0.406681	-0.576005	0.155966	-0.214283	-0.442367
PaPd42	PaCg23	Coral Gardens	2015-01-17	7.11814	134.271	exposed	patch reef	fore reef	outside	emergent	afternoon	28.8	33.9	37	19.5	15 — 20	P. acuta	yes	4	pale	14	60	0	C w/residual A	1.1122	6.38827e-08	63.8827	2.89742	97.1026	2140.93	1738.97	6.48611e-09	6.48611
PaPd43	PaCg23	Coral Gardens	2015-01-17	7.11814	134.271	exposed	patch reef	fore reef	outside	emergent	afternoon	28.8	33.9	51	15	15 — 20	P. acuta	yes	5	healthy	14	69	0	C w/residual A	0.326966	1.60974e-07	160.974	3.87322	96.1268	3995.11	4806.22	1.51294e-09	1.51294	7.79818e-12	0.00779818	10.5367	0.385341	11.2424	0.191197	3.51405	0.351324	8.45497	3.22852	0.730252	0.43947	-0.458491	-0.15809	-0.26607	0.276538
PaPd44	PaAn24	Santa Maria Corner	2015-01-18	6.92113	134.123	intermediate	fringing reef	fore reef	outside	emergent	morning	28.5	34.1	46	30.3	≥ 30	P. acuta	some	3	pale	8	26	20	C w/residual A	0.969231	1.0783e-08	10.783	0.974719	99.0253	1095.48	378.466	1.86265e-09	1.86265	4.47888e-12	0.00447888	9.8311	0.385311	0.197158	0.00541161	0.0865858	0.0283094	0.0232001	0.442606	2.5852	-0.401589	-0.45852	-0.290568	-0.704435	-0.710535
PaPd44.2	PaAn24	Santa Maria Corner	2015-01-18	6.92113	134.123	intermediate	fringing reef	fore reef	outside	emergent	morning	28.5	34.1	46	30.3	≥ 30	P. acuta	some	3	pale			0	C w/residual A	0.660432	2.71714e-08	27.1714	1.31173	98.6883	2044.25	849.627	3.31886e-09	3.31886	7.79818e-12	0.00779818	7.98533	0.432389	0.702418	0.437855	2.53478	0.0919548	9.24406	1.37275		-0.363115	-0.414183	0.0177952	-0.391316	-0.516047
PaPd45.2	PaAn24	Santa Maria Corner	2015-01-18	6.92113	134.123	intermediate	fringing reef	fore reef	outside	emergent	morning	27.9	34.3	28	25.2	25 — 30	P. acuta	yes	3	fluorescent			0	D w/residual A+C	0	1.90618e-09	1.90618	0.0849425	99.9151	2242.18	0.193538	3.24305e-09	3.24305	6.43897e-07	643.897	12.6759	0.00757887	0.231572		0.0113647	0.068056	0.00794375	0.0696467	40.9948	-0.398968	-0.814251		-0.714055	-0.589077
PaPd47	PaCp27	Crocodile Point	2015-01-19	7.41292	134.337	intermediate	barrier reef	fore reef	outside	emergent	morning	26.4	34.2	51	26	25 — 30	P. acuta	yes	5	healthy	19	165	0	C w/residual A	3.30909	3.00389e-07	300.389	4.32702	95.673	6641.77	12394	3.24305e-09	3.24305	1.10283e-11	0.0110283	11.035	1.37276	3.2275	0.0917145	1.76536	0.163846	0.595963	1.65147	32.4458	-0.170838	0.471421	-0.229028	-0.489724	-0.296359
PaPd48	PaWp29	Western Passage	2015-01-19	7.54777	134.459	intermediate	barrier reef	fore reef	outside	emergent	afternoon	28.6	34	74	17.4	15 — 20	P. acuta	yes	5	healthy	11	44	0	D w/residual A+C	0.758491	4.73082e-08	47.3082	1.84504	98.155	2516.76	2348.22	3.59839e-09	3.59839	4.76837e-07	476.837	0.0472793		0.221268	1.24517	0.988293	0.288612	5.46294	9.12949	19.4677	-0.399753		0.593469	-0.589108	0.0848995
PaPd49	PaBb30	Babeltheop	2015-01-20	7.5988	134.48	exposed	barrier reef	fore reef	outside	emergent	morning	28.1	34	19	30.6	≥ 30	P. acuta	yes	3	bleached	8	33	20	C w/residual A	2.30769	1.33808e-07	133.808	4.13971	95.8603	3098.5	3559.24	5.73296e-10	0.573296	1.92014e-11	0.0192014	7.80295	1.31167	3.46151	0.0427027	0.988837	0.266352	2.86223	2.08214	25.1149	-0.153018	0.413884	-0.263977	-0.589039	0.0168769
PaPd50	PaBb32	Babeltheop	2015-01-20	7.4967	134.383	intermediate	barrier reef	fore reef	outside	emergent	afternoon	28.8	33.9	28	29.6	25 — 30	P. acuta	yes	4	healthy	13	95	10	C w/ residual A+D	0.916667	1.27765e-07	127.765	6.27804	93.722	1907.35	3995.11	4.58637e-09	4.58637	1.03778e-07	103.778	12.3864	0.243313	0.139747	0.00102253	0.205378	0.0105074	0.580896	0.546219	0.0213397	-0.40596	-0.592247	-0.293698	-0.689242	-0.764935
PaPd51	PaBb32	Babeltheop	2015-01-20	7.4967	134.383	intermediate	barrier reef	fore reef	outside	emergent	afternoon	28.8	33.9	28	29.9	25 — 30	P. acuta	yes	5	healthy	10	53	0	C w/residual A	1.15	6.6904e-08	66.904	2.16194	97.8381	3027.73	7284.86	4.13347e-09	4.13347	1.05303e-11	0.0105303	1.31709	1.50578	15.532	0.968848	23.496	0.254166	87.6901	12.9108	2.55681	0.766112	0.596686	0.396431	2.28958	-0.0203612
PaPd52-tumor	PaAw33	N of western passage	2015-01-21	7.6323	134.521	exposed	patch reef	fore reef	outside	emergent	morning	28.6	34	32	14.6	10 — 15	P. acuta	yes	2	sick	19	128	0	C w/residual A	4.08	1.43412e-07	143.412	1.84504	98.155	7629.39	7990.22	6.05175e-09	6.05175	5.32631e-12	0.00532631	2.82324	1.72887	6.60317	0.357582	7.54931	0.248243	20.3884	5.36344		0.086209	0.806782	-0.0394458	0.250031	-0.0384587
PaPd53-day	PaBb31-dive 3 (day)	Babeltheop	2015-01-21	7.54509	134.488	protected	patch reef	lagoonal	inside	submerged	midday	28.9	33.6	110	11	10 — 15	P. acuta	yes	5	healthy	19	221	0	D w/residual A+C	0.363559	1.28701e-09	1.28701	0.0690057	99.931	1863.78	0.085221	1.25761e-09	1.25761	5.60545e-07	560.545	1.90618	7.5835	42.8988	0.0258052	12.6156	1.50476	6.91857	16.2556	1541.88	2.85	6.32042	-0.276026	0.898002	3.80121
PaPd53.3 (night)	PaBb31-dive 4 (night)	Babeltheop	2015-01-21	7.54509	134.488	protected	patch reef	lagoonal	inside	submerged	night			0	11	10 — 15	P. acuta	yes	5	healthy	19	221	0	D w/residual A+C	0.376945	3.0966e-09	3.0966	0.120085	99.8799	2575.59	0.0882263	8.55847e-09	8.55847	1.73897e-06	1738.97
PaPd54.1-2	PaBb31-dive 3 (day)	Babeltheop	2015-01-21	7.54509	134.488	protected	patch reef	lagoonal	inside	submerged	midday	28.9	33.6	119	10.9	10 — 15	P. acuta	yes	5	fluorescent			0	C w/residual A	1.05124	1.27765e-07	127.765	8.12103	91.879	1445.5	5033.52	5.26836e-09	5.26836	1.55964e-11	0.0155964	6.1932	1.77879	2.24113	0.200037	4.42293	0.249577	1.71515	6.19409	22.2902	-0.245947	0.853795	-0.151786	-0.149825	-0.0343813
PaPd54.3 (night)	PaBb31-dive 4 (night)	Babeltheop	2015-01-21	7.54509	134.488	protected	patch reef	lagoonal	inside	submerged	night			0	10.9	10 — 15	P. acuta	yes	5	fluorescent			0	C w/residual A	0.322594	9.90913e-08	99.0913	3.70479	96.2952	2575.59	5394.8	1.4614e-09	1.4614	1.20961e-11	0.0120961	15.9707		0.0162684	0.000399535	0.000799069	0.00228259	0.00247894	0.00239054		-0.415363		-0.294142	-0.715407	-0.790068
PaPd55-day	PaBb31-dive 3 (day)	Babeltheop	2015-01-21	7.54509	134.488	protected	patch reef	lagoonal	inside	submerged	midday	28.9	33.6	110	10.9	10 — 15	P. acuta	some	3	pale	12	61	0	D w/residual A+C	2.63333	2.69575e-09	2.69575	0.097561	99.9024	2760.45	2.57401	8.89266e-10	0.889266	6.90112e-07	690.112	8.96323	0.992768	5.88154		1.19545	0.0492475	0.0747155	5.36234		0.0312593	0.113557		-0.562614	-0.646552
PaPd55.3 (night)	PaBb31-dive 4 (night)	Babeltheop	2015-01-21	7.54509	134.488	protected	patch reef	lagoonal	inside	submerged	night			0	10.9	10 — 15	P. acuta	yes	3	pale	12	61	0	D w/residual A+C	0.995018	3.0966e-09	3.0966	0.131696	99.8683	2348.22	0.387075	3.72529e-09	3.72529	1.47929e-06	1479.29	9.17274	0.226287	0.342987	0.0697359	4.56742	0.0356379	0.00602306	0.806395	7.59322	-0.390484	-0.608282	-0.2447	-0.131346	-0.688141
PaPd56.1-2	PaBb31-dive 3 (day)	Babeltheop	2015-01-21	7.54509	134.488	protected	patch reef	lagoonal	inside	submerged	midday	28.9	33.6	110	10.6	10 — 15	P. acuta	yes	5	fluorescent	12	74	0	C w/ residual A+D	0.366667	1.33808e-07	133.808	5.51014	94.4899	2294.59	1660.44	3.99267e-09	3.99267	1.51294e-09	1.51294	13.9033	0.149644	0.0505179	0.00141784	0.0687695	0.00602957	0.0385956	0.404143	0.223433	-0.412755	-0.680461	-0.293416	-0.706714	-0.778618
PaPd56.3 (night)	PaBb31-dive 4 (night)	Babeltheop	2015-01-21	7.54509	134.488	protected	patch reef	lagoonal	inside	submerged	night			0	10.6	10 — 15	P. acuta	yes	5	fluorescent	12	74	0	C+D w/residual A	0.506388	2.12407e-07	212.407	10.4448	89.5552	1821.22	6055.45	4.58637e-09	4.58637	4.48436e-06	4484.36
PaPd57.1-2	PaBb31-dive 3 (day)	Babeltheop	2015-01-21	7.54509	134.488	protected	patch reef	lagoonal	inside	submerged	midday	28.9	33.6	69	10.6	10 — 15	P. acuta	yes	3	healthy	28	325	0	C w/residual A	1.15034	1.46764e-07	146.764	8.12103	91.879	1660.44	869.486	4.27923e-09	4.27923			4.69357	2.45635	6.94761	0.0601623	2.1116	0.344645	0.552867	1.22817	10.8905	0.112437	1.4919	-0.251527	-0.44544	0.256127
PaPd57.3 (night)	PaBb31-dive 4 (night)	Babeltheop	2015-01-21	7.54509	134.488	protected	patch reef	lagoonal	inside	submerged	night			0	10.6	10 — 15	P. acuta	yes	3	healthy	28	325	0	D w/residual A+C	0.601195	5.64648e-09	5.64648	0.169741	99.8303	3320.89	0.792246	5.84561e-09	5.84561	3.72757e-06	3727.57	1.99633	0.496392	2.50166		12.9235	0.248196	0.21148	1.14041	17.4513	-0.226108	-0.353909		0.937382	-0.0386034
PaPd58-day	PaBb31-dive 3 (day)	Babeltheop	2015-01-21	7.54509	134.488	protected	patch reef	lagoonal	inside	submerged	midday	28.9	33.6	142	10.5	10 — 15	P. acuta	yes	3	healthy	41	441	0	D w/residual A+C	1.2375	7.28041e-09	7.28041	0.199479	99.8005	3642.43	1.20082	2.40164e-09	2.40164	3.45056e-07	345.056	0.705811	0.769978	17.0247		4.07187	0.473977	0.179953	9.33655	656.67	0.879774	-0.0962566		-0.194726	0.651342
PaPd58.3 (night)	PaBb31-dive 4 (night)	Babeltheop	2015-01-21	7.54509	134.488	protected	patch reef	lagoonal	inside	submerged	night			0	10.5	10 — 15	P. acuta	yes	3	healthy	41	441	0	D w/residual A+C	0.438189	4.48162e-09	4.48162	0.239881	99.7601	1863.78	0.133726	6.33796e-09	6.33796	1.31789e-06	1317.89
PaPd59.1-2	PaBb31-dive 3 (day)	Babeltheop	2015-01-21	7.54509	134.488	protected	patch reef	lagoonal	inside	submerged	midday	28.9	33.6	174	10.5	10 — 15	P. acuta	yes	4	healthy	8	35	0	D w/residual A+C	1.23158	1.95074e-09	1.95074	0.162088	99.8379	1201.55	1.62153	5.64648e-09	5.64648	8.30222e-07	830.222	23.6541	0.0340313	0.0504036		0.0141651	0.0117571	0.00294364	0.0857534	4.6756	-0.412763	-0.78934		-0.713697	-0.761116
PaPd59.3 (night)	PaBb31-dive 4 (night)	Babeltheop	2015-01-21	7.54509	134.488	protected	patch reef	lagoonal	inside	submerged	night			0	10.5	10 — 15	P. acuta	yes	4	healthy	8	35	0	D w/residual A+C	0.48777	4.91555e-09	4.91555	0.199479	99.8005	2459.28	4.08599	2.29319e-09	2.29319	1.90735e-06	1907.35	1.86265	0.926327	4.88919		36.5641	0.452585	0.886192	4.77752		-0.0443056	0.0509864		3.96097	0.585972
PaPd60.1-2	PaBb31-dive 3 (day)	Babeltheop	2015-01-21	7.54509	134.488	protected	patch reef	lagoonal	inside	submerged	midday	28.9	33.6	174	9.5	5 — 10	P. acuta	yes	4	healthy	23	269	0	D w/residual A+C	0.159441	8.29714e-10	0.829714	0.0523053	99.9477	1585.46	0.180577	4.74811e-09	4.74811	1.89233e-07	189.233
PaPd60.3 (night)	PaBb31-dive 4 (night)	Babeltheop	2015-01-21	7.54509	134.488	protected	patch reef	lagoonal	inside	submerged	night			0	9.5	5 — 10	P. acuta	yes	4	healthy	23	269	0	D w/residual A+C	0.515229	2.51522e-09	2.51522	0.15125	99.8488	1660.44	0.0623854	2.21507e-09	2.21507	1.04601e-06	1046.01	8.55847	0.597196	0.519889	0.0126183	8.33006	0.136119	0.0109849	1.61285	14.1722	-0.377014	-0.258976	-0.285429	0.349888	-0.381089
PaPd61.1-2	PaBb31-dive 3 (day)	Babeltheop	2015-01-21	7.54509	134.488	protected	patch reef	lagoonal	inside	submerged	midday	28.9	33.6	92	9.8	5 — 10	P. acuta	yes	5	healthy	18	210	0	D w/residual A+C	0.453251	2.18963e-09	2.18963	0.0706175	99.9294	3098.5	0.300205	7.19679e-09	7.19679	4.08849e-06	4088.49
PaPd61.3 (night)	PaBb31-dive 4 (night)	Babeltheop	2015-01-21	7.54509	134.488	protected	patch reef	lagoonal	inside	submerged	night			0	9.8	5 — 10	P. acuta	yes	5	healthy	18	210	0	D w/residual A+C	0.512338	3.02588e-09	3.02588	0.097561	99.9024	3098.5	0.829714	1.99633e-09	1.99633	3.39851e-06	3398.51	10.2961	0.253992	0.926281	0.115895	9.78713	0.156351	0.149431	1.37191	63.5969	-0.346068	-0.58219	-0.211786	0.536243	-0.319266
PaPd62	PaAw36	Aiwakoko passage outer	2015-01-22	7.6864	134.543	exposed	barrier reef	fore reef	outside	emergent	morning	26.8	34.2	51	29.1	25 — 30	P. acuta	yes	5	healthy	10	49	0	C w/residual A	0.626087	7.17059e-08	71.7059	4.32702	95.673	1585.46	1951.93	4.91555e-09	4.91555	2.95496e-12	0.00295496
PaPd63	PaAw36	Aiwakoko passage outer	2015-01-22	7.6864	134.543	exposed	barrier reef	fore reef	outside	emergent	morning	26.8	34.2	28	26.3	25 — 30	P. acuta	yes	3	pale	15	88	30	D w/residual A+C	0.167772	1.34787e-09	1.34787	0.0690057	99.931	1951.93	0.180577	5.91353e-09	5.91353	3.47795e-06	3477.95	7.28041	1.57592	5.00324		6.30781	0.248192	0.01911	4.15888		-0.0356211	0.662745		0.0912465	-0.0386153
PaPd64	PaAw36	Aiwakoko passage outer	2015-01-22	7.6864	134.543	exposed	barrier reef	fore reef	outside	emergent	morning	26.8	34.2	119	15.2	15 — 20	P. acuta	yes	4	bleached	18.5	162	5	C w/ residual A+D	1.02857	8.6264e-08	86.264	4.04898	95.951	2044.25	4806.22	3.24305e-09	3.24305	5.43097e-11	0.0543097	12.9722	0.279128	0.598324	0.000607753	0.230436	0.0148403	0.529404	0.359899	2.99476	-0.371041	-0.558518	-0.293994	-0.686037	-0.751694
PaPd65-tumor	PaBb37	Babeltheop	2015-01-22	7.6917	134.558	exposed	barrier reef	fore reef	outside	emergent	midday	27.7	34.3	87	24.7	20 — 25	P. acuta	yes	2	sick	17	132	0	C w/residual A	0.0918367	2.25859e-08	22.5859	2.53185	97.4681	869.486	1147.29	2.29319e-09	2.29319	5.14488e-12	0.00514488	1.99633	6.46958	23.055	0.00467703	1.73284	0.328433	0.167993	1.61739	60.82	1.33896	5.27138	-0.291092	-0.493882	0.206587
PaPd66	PaBb37	Babeltheop	2015-01-20	7.6917	134.558	exposed	barrier reef	fore reef	outside	emergent	afternoon	27.7	34.3	28	29.6	25 — 30	P. acuta	yes	4	healthy	13	95	10	D+A+C	0.916667	6.95164e-09	6.95164	0.467734	99.5323	1479.29	24.7728	7.98533e-09	7.98533	1.16487e-07	116.487
PaPd67	PaBb38	Babeltheop	2015-01-22	7.6464	134.536	intermediate	barrier reef	fore reef	outside	emergent	afternoon	27.3	34.3	23	29.1	25 — 30	P. acuta	yes	2	sick			0	C w/residual A	0.286405	1.7517e-08	17.517	3.62324	96.3768	465.946	523.007	1.73791e-09	1.73791	1.37854e-12	0.00137854	2.09075	2.64021	3.91041	0.00543333	1.1562	0.268065	0.190701	3.91041		-0.118836	1.66505	-0.290553	-0.567634	0.0221116
PaPd68	PaCo40	Babeltheop	2015-01-23	7.8514	134.507	intermediate	barrier reef	fore reef	outside	emergent	midday	28.7	34.1	42	28.7	25 — 30	P. acuta	some	3	bleached	16	130	10	C w/residual A	2.2875	2.43991e-07	243.991	3.62324	96.3768	6490.08	8968.72	7.62473e-09	7.62473	1.26682e-11	0.0126682	5.84561	1.9189	9.02305	0.105798	2.62573	0.55106	0.703548	5.42748	4.57167	0.270475	0.985752	-0.218985	-0.379684	0.886894
PaPd69.2	PaCo40	Babeltheop	2015-01-23	7.8514	134.507	intermediate	barrier reef	fore reef	outside	emergent	afternoon	28.7	34.1	69	24.7	20 — 25	P. acuta		3	healthy	19	88	0	C w/residual A	1.57391	3.61375e-07	361.375	10.885	89.115	2958.57	8368.11	2.82324e-09	2.82324	1.59609e-11	0.0159609	21.0734	0.00980755	0.00308918	0.000139164	0.0107147	0.00173375	0.00233192	0.049427	0.0128901	-0.416366	-0.812152	-0.294328	-0.714139	-0.791745
PaPd70	PaBb41	Babeltheop	2015-01-23	7.781	134.559	intermediate	barrier reef	fore reef	outside	emergent	afternoon	29.1	34.1	46	20.8	20 — 25	P. acuta	yes	2	sick	13	77	0	C w/residual A	0.580435	4.02436e-08	40.2436	1.97485	98.0251	1997.56	1174.11	3.02588e-09	3.02588	1.29643e-11	0.0129643	15.2495	0.0919867	0.118605	0.0014648	0.0604375	0.0114983	0.0288541	0.452996	0.785447	-0.40757	-0.73476	-0.293382	-0.707779	-0.761907
PaPd71	PaBb41	Babeltheop	2015-01-23	7.781	134.559	intermediate	barrier reef	fore reef	outside	emergent	afternoon	29.1	34.1	42	20	20 — 25	P. acuta	yes	4	healthy	25	263	0	C w/residual A	0.477876	7.68525e-08	76.8525	2.53185	97.4681	2958.57	4589.18	1.04537e-09	1.04537			2.82324	2.03361	32.5378	0.160407	3.15974	0.752994	8.93711	11.5038		2.06105	1.09378	-0.180045	-0.311385	1.50397
PaPd73	PaBb41	Babeltheop	2015-01-23	7.781	134.559	intermediate	barrier reef	fore reef	outside	emergent	afternoon	29.1	34.1	23	9.1	5 — 10	P. acuta	yes	5	healthy			0	D w/residual A+C	1.55	5.26836e-09	5.26836	0.181902	99.8181	2891	8.75851	1.99633e-09	1.99633	1.4455e-06	1445.5	0.774151	3.53792	115.86		51.1066	2.28084	6.31495	13.5126	121.553	8.40574	2.51047		5.82091	6.17279
PaPd75.1-2	PaWb43-day	Back reef near Aiwakoko channel	2015-01-24	7.6563	134.565	intermediate	back reef	back reef	inside	submerged	midday	29.1	34	110	10	10 — 15	P. acuta	yes	4	pale	10	42	0	D w/residual A+C	0.483453	1.0215e-09	1.0215	0.0643876	99.9356	1585.46	0.241041	2.40164e-09	2.40164	4.65946e-07	465.946
PaPd75.3 (night)	PaWb43-night	Back reef near Aiwakoko channel	2015-01-24	7.6563	134.565	intermediate	back reef	back reef	inside	submerged	night			0	10	10 — 15	P. acuta		4	pale	10	42	0	D w/residual A+C	0.524324	1.65943e-09	1.65943	0.0756822	99.9243	2190.97	0.293348	3.35742e-09	3.35742	1.82122e-06	1821.22	16.726	0.206306	0.145881	0.0800606	3.45951	0.0104733	0.00574784	0.884455	1.81156	-0.405493	-0.627098	-0.237338	-0.273045	-0.765039
PaPd76.1-2	PaWb43-day	Back reef near Aiwakoko channel	2015-01-24	7.6563	134.565	intermediate	back reef	back reef	inside	submerged	midday	29.1	34	115	11.7	10 — 15	P. acuta	yes	5	healthy	22	274	0	D w/residual A+C	0.635294	3.81236e-09	3.81236	0.239881	99.7601	1585.46	0.207429	6.48611e-09	6.48611	3.53121e-07	353.121
PaPd76.3 (night)	PaWb43-night	Back reef near Aiwakoko channel	2015-01-24	7.6563	134.565	intermediate	back reef	back reef	inside	submerged	night			0	11.7	10 — 15	P. acuta		5	healthy	22	274	0	D w/residual A+C	0.428084	3.99267e-09	3.99267	0.208893	99.7911	1907.35	0.124771	7.98533e-09	7.98533	1.22964e-06	1229.64
PaPd77-day	PaWb43-day	Back reef near Aiwakoko channel	2015-01-24	7.6563	134.565	intermediate	back reef	back reef	inside	submerged	midday	29.1	34	37	11.7	10 — 15	P. acuta	yes	4	healthy	15	92	0	D w/residual A+C	1.03333	1.34787e-09	1.34787	0.0658916	99.9341	2044.25	0.207429	1.06981e-09	1.06981	1.31789e-06	1317.89	0.0823181	0.0324911	4.0172		0.825741	0.0146413	6.02277	2.68116		-0.110705	-0.79079		-0.609898	-0.752302
PaPd77.3 (night)	PaWb43-night	Back reef near Aiwakoko channel	2015-01-24	7.6563	134.565	intermediate	back reef	back reef	inside	submerged	night			0	11.7	10 — 15	P. acuta		4	healthy	15	92	0	D w/residual A+C	0.74026	5.26836e-09	5.26836	0.186145	99.8139	2824.97	0.414857	1.41162e-09	1.41162	3.02773e-06	3027.73	7.45058	0.463157	0.570213	0.0276898	4.07133	0.1241	0.108229	2.56017	18.7069	-0.373182	-0.385208	-0.274682	-0.194795	-0.417818
PaPd78.1-2	PaWb43-day	Back reef near Aiwakoko channel	2015-01-24	7.6563	134.565	intermediate	back reef	back reef	inside	submerged	midday	29.1	34	74	10.5	10 — 15	P. acuta	yes	3	pale	23	307	0	D w/residual A+C	0.679365	6.43503e-10	0.643503	0.0535272	99.9465	1201.55	0.868955	3.55706e-09	3.55706	5.87055e-07	587.055	8.75851	1.53994	1.61277	0.087793	10.73	0.298584	0.0592756	6.60187		-0.293794	0.628861	-0.231824	0.656839	0.115373
PaPd78.3 (night)	PaWb43-night	Back reef near Aiwakoko channel	2015-01-24	7.6563	134.565	intermediate	back reef	back reef	inside	submerged	night			0	10.5	10 — 15	P. acuta		3	pale	23	307	0	D w/residual A+C	0.500778	8.55847e-09	8.55847	0.316283	99.6837	2697.4	0.119136	1.86265e-09	1.86265	4.28185e-06	4281.85	6.48611	0.46318	1.22234	0.00407415	3.63187	0.139304	0.0450409	2.5603	5.9	-0.323524	-0.385185	-0.291522	-0.251	-0.371355
PaPd79 (night)	PaWb43-night	Back reef near Aiwakoko channel	2015-01-24	7.6563	134.565	intermediate	back reef	back reef	inside	submerged	midday			124	9.5	5 — 10	P. acuta	yes	4	pale	29	334	0	A w/residual C+D	0.655507	2.95676e-09	2.95676	0.16587	99.8341	1779.62	0.212277	9.8311e-09	9.8311	8.82263e-11	0.0882263
PaPd79.3 (day)	PaWb43-day	Back reef near Aiwakoko channel	2015-01-24	7.6563	134.565	intermediate	back reef	back reef	inside	submerged	night	29.1	34	0	9.5	5 — 10	P. acuta		4	pale	29	334	0	D w/residual A+C	0.688479	1.69822e-09	1.69822	0.114668	99.8853	1479.29	0.232831	2.13962e-09	2.13962	1.60974e-07	160.974	12.6759	0.884493	8.31811	0.00555422	2.13041	0.452583	0.1798	3.62067		0.216796	0.0115883	-0.290466	-0.443034	0.585967
PaPd80-day	PaWb43-day	Back reef near Aiwakoko channel	2015-01-24	7.6563	134.565	intermediate	back reef	back reef	inside	submerged	midday	29.1	34	119	11.8	10 — 15	P. acuta	yes	5	healthy	20	206	0	D w/residual A+C	0.656757	2.40164e-09	2.40164	0.0998391	99.9002	2403.11	0.286648	9.75369e-10	0.975369	1.02212e-06	1022.12	7.80295	0.947942	9.55465		1.65204	0.384984	0.351335	3.37808	865.617	0.310955	0.0713419		-0.504216	0.379396
PaPd80.3 (night)	PaWb43-night	Back reef near Aiwakoko channel	2015-01-24	7.6563	134.565	intermediate	back reef	back reef	inside	submerged	night			0	11.8	10 — 15	P. acuta		5	healthy	20	206	0	D w/residual A+C	0.468977	3.81236e-09	3.81236	0.15125	99.8488	2516.76	0.293348	1.0215e-09	1.0215	1.90735e-06	1907.35	0.0384027		0.221119	2.77983	2.39218	0.0649841	1.34257	5.00336	43.9663	-0.399764		1.68779	-0.409554	-0.598464
PaPd81-day	PaWb43-day	Back reef near Aiwakoko channel	2015-01-24	7.6563	134.565	intermediate	back reef	back reef	inside	submerged	midday	29.1	34	101	10.3	10 — 15	P. acuta	yes	3	pale	15	92	0	D w/residual A+C	0.384211	3.0966e-09	3.0966	0.125757	99.8742	2459.28	0.829714	1.86265e-09	1.86265	1.73897e-06	1738.97	9.38714	0.570204	6.30378		5.12645	0.285102	0.133166	3.88043	671.523	0.0634114	-0.284395		-0.0598476	0.0741754
PaPd81.3 (night)	PaWb43-night	Back reef near Aiwakoko channel	2015-01-24	7.6563	134.565	intermediate	back reef	back reef	inside	submerged	night			0	10.3	10 — 15	P. acuta		3	pale	15	92	0	D w/residual A+C	0.551923	3.90147e-09	3.90147	0.177754	99.8222	2190.97	0.487684	3.16898e-09	3.16898	3.39851e-06	3398.51	10.5367	0.149297	0.752412		5.12912	0.0635012	0.0681746	2.12814	16.6646	-0.359308	-0.680787		-0.059506	-0.602996
PaPd82.1-2	PaWb43-day	Back reef near Aiwakoko channel	2015-01-24	7.6563	134.565	intermediate	back reef	back reef	inside	submerged	midday	29.1	34	161	10	10 — 15	P. acuta	yes	4	healthy	23	297	0	D w/residual A+C	0.380064	7.05811e-10	0.705811	0.0369911	99.963	1907.35	1.25761	2.06673e-09	2.06673	7.06242e-07	706.242	8.55847	1.47036	1.3719		2.00928	0.136109	0.0419073	6.6017	2876.32	-0.312136	0.563335		-0.458527	-0.381119
PaPd82.3 (night	PaWb43-night	Back reef near Aiwakoko channel	2015-01-24	7.6563	134.565	intermediate	back reef	back reef	inside	submerged	night			0	10	10 — 15	P. acuta		4	healthy	23	297	0	D w/residual A+C	0.0973684	1.28701e-09	1.28701	0.0739549	99.926	1738.97	0.0543097	3.99267e-09	3.99267	1.90735e-06	1907.35	6.33796	0.640027	1.30997	0.0424099	15.5324	0.0492479	0.0325141	4.5616	39.1393	-0.316851	-0.218639	-0.264186	1.27105	-0.646551
PaPd83-day	PaWb43-day	Back reef near Aiwakoko channel	2015-01-24	7.6563	134.565	intermediate	back reef	back reef	inside	submerged	midday	29.1	34	110	11	10 — 15	P. acuta	yes	4	pale	14	131	0	D w/residual A+C	0.282759	4.48162e-09	4.48162	0.15478	99.8452	2891	1.14659	2.29319e-09	2.29319	2.95857e-06	2958.57	5.64648	1.03974	7.76088		4.56847	0.442236	0.292203	3.79181	826.982	0.174365	0.157792		-0.131211	0.554346
PaPd83.3 (night)	PaWb43-night	Back reef near Aiwakoko channel	2015-01-24	7.6563	134.565	intermediate	back reef	back reef	inside	submerged	night			0	11	10 — 15	P. acuta		4	pale	14	131	0	D w/residual A+C	0.579029	3.90147e-09	3.90147	0.190488	99.8095	2044.25	0.344845	2.37405e-09	2.37405	9.10608e-07	910.608	6.95164	0.32751	1.76901		5.62646	0.121269	0.266504	3.70535	28.3556	-0.281897	-0.512954		0.00410325	-0.426469
PaPd84.2	PaWb45	Babeltheop	2015-01-25	7.7717	134.565	intermediate	barrier reef	fore reef	outside	submerged	morning	28.1	34.2	46	29.8	25 — 30	P. acuta		2	sick	17	125	0	C w/residual A	1	2.17372e-07	217.372	6.84431	93.1557	2958.57	5782	2.9228e-09	2.9228	3.81003e-12	0.00381003
PaPd85	PaWb45	Babeltheop	2015-01-25	7.7717	134.565	intermediate	barrier reef	fore reef	outside	submerged	morning	28.1	34.2	37	26	25 — 30	P. acuta	yes	1	bleached	9	25	75	C w/residual A	1.85854	5.96046e-08	59.6046	2.16194	97.8381	2697.4	2760.45	1.17339e-09	1.17339	2.91038e-11	0.0291038	1.99633	2.0335	15.1786	0.384488	6.74745	0.226456	24.0452	10.0141		0.7392	1.09368	-0.0202598	0.147475	-0.105038
PaPd86	PaWb45	Babeltheop	2015-01-25	7.7717	134.565	intermediate	barrier reef	fore reef	outside	submerged	morning	28.1	34.2	124	15	15 — 20	P. acuta	yes	4	pale	10	49	0	C w/residual A	2.22857	7.56932e-07	756.932	15.6216	84.3784	4088.49	6797.02	3.47582e-09	3.47582	3.5831e-11	0.035831	7.11412	0.395472	5.02218	0.0442309	0.500415	0.279641	1.74255	1.47595	3.64992	-0.0341789	-0.448951	-0.262887	-0.651507	0.0574859
PaPd87-tumor	PaWb47	Aiwakoko Passage inner	2015-01-25	7.6403	134.547	intermediate	channel reef	back reef	inside	emergent	afternoon	28.8	34.3	19	26	25 — 30	P. acuta	yes	4	sick	9	27	0	D w/residual A+C	1.90286	3.0966e-09	3.0966	0.295165	99.7048	1046.01	0.321752	2.51522e-09	2.51522	2.09203e-06	2092.03	12.3864	0.655144	5.48903	0.0429979	2.03789	0.0620633	0.00957668	5.00447		0.00137052	-0.204402	-0.263766	-0.454867	-0.60739
PaPd88.2	PaWb47	Aiwakoko Passage inner	2015-01-25	7.6403	134.547	intermediate	channel reef	back reef	inside	emergent	afternoon	28.8	34.3	23	20	20 — 25	P. acuta		1	sick	16	79	60	D w/residual A+C	0.776471	3.55706e-09	3.55706	0.204132	99.7959	1738.97	0.868955	6.33796e-09	6.33796	2.51676e-06	2516.76
PaPd89.2	PaWb47	Aiwakoko Passage inner	2015-01-25	7.6403	134.547	intermediate	channel reef	back reef	inside	emergent	afternoon	28.8	34.3	28	10.8	10 — 15	P. acuta		2	sick	11	62	0	D w/residual A+C	0.484746	1.86265e-09	1.86265	0.0706175	99.9294	2635.79	0.0786007	2.63418e-09	2.63418	6.2919e-07	629.19	4.69357	0.442224	1.37191	0.010976	29.661	0.160004	0.532368	4.35553	74.7411	-0.312135	-0.404921	-0.2866	3.07807	-0.3081
PaPd90	PaWb47	Aiwakoko Passage inner	2015-01-25	7.6403	134.547	intermediate	channel reef	back reef	inside	emergent	afternoon	28.8	34.3	64	5.8	5 — 10	P. acuta	yes	5	fluorescent			0	D w/residual A+C	0.959184	5.26836e-09	5.26836	0.194932	99.8051	2697.4	0.329272	3.99267e-09	3.99267	3.14595e-07	314.595	15.9707	0.473985	2.74394	0.0132209	2.23296	0.118496	0.0186971	0.992804	14.849	-0.207659	-0.37501	-0.285	-0.429918	-0.434941
PaPd91	PaWb48	Aiwakoko lagoonal area	2015-01-26	7.7156	134.584	protected	patch reef	back reef	inside	emergent	morning	29	34	23	23.8	20 — 25	P. acuta	yes	5	healthy	14	95	0	D w/residual A+C	1.125	2.63418e-09	2.63418	0.0931594	99.9068	2824.97	0.414857	1.99633e-09	1.99633	1.36936e-07	136.936	2.82324	0.718399	1.68903		5.00772	0.3592	0.611668	0.787958	40.9982	-0.287988	-0.144831		-0.0750319	0.300604
PaPd92-bleached	PaWb48	Aiwakoko lagoonal area	2015-01-26	7.7156	134.584	protected	patch reef	back reef	inside	emergent	morning	29	34	28	20	20 — 25	P. acuta	yes	4	bleached	26	238	1	C w/residual A	1.716	7.86488e-08	78.6488	2.96314	97.0369	2575.59	975.965	2.72707e-09	2.72707	1.18198e-11	0.0118198	0.405382	0.017431	0.204164		0.075165	0.0120441	11.5745	3.08329	20.6233	-0.401055	-0.804973		-0.705896	-0.760239
PaPd93-bleached	PaWb48	Aiwakoko lagoonal area	2015-01-26	7.7156	134.584	protected	patch reef	back reef	inside	emergent	morning	29	34	60	13.7	10 — 15	P. acuta	no	1	bleached	10	49	50	D w/residual A+C	0.549533	9.31323e-10	0.931323	0.0476901	99.9523	1951.93	0.560202	2.13962e-09	2.13962	1.28779e-06	1287.79	0.079514	0.0207058	0.380556		0.496603	0.0121703	13.9949	9.66551	6383.65	-0.387623	-0.801889		-0.651995	-0.759853
PaPd95-bleached	PaWb50	Aiwakoko lagoonal area	2015-01-26	7.6674	134.599	protected	patch reef	lagoonal	inside	emergent	afternoon	29.2	34.1	42	13.7	10 — 15	P. acuta	yes	3	bleached			15	D w/residual A+C	0.681818	6.43503e-10	0.643503	0.0361465	99.9639	1779.62	0.0595682	3.99267e-09	3.99267	4.24814e-07	424.814	21.566	0.0696455	0.024061	0.0325018	0.10083	0.00511697	0.0186674	0.359195	13.8326	-0.414769	-0.7558	-0.271251	-0.702613	-0.781407
PaPd96	PaWb50	Aiwakoko lagoonal area	2015-01-26	7.6674	134.599	protected	patch reef	lagoonal	inside	emergent	afternoon	29.2	34.1	37	10.2	10 — 15	P. acuta	yes	5	healthy	18	193	0	D w/residual A+C	1.08611	3.55706e-09	3.55706	0.0739549	99.926	4806.22	0.0882263	7.98533e-09	7.98533	3.14595e-07	314.595
PaPd98-bleached	PaAw51	Aiwakoko lagoonal area	2015-01-27	7.5986	134.508	protected	patch reef	back reef	inside	submerged	morning	28.6	34	51	15.2	15 — 20	P. acuta	yes	4	bleached	16	104	1	D w/residual A+C	0.5	1.58449e-09	1.58449	0.0658916	99.9341	2403.11	1.0215	2.95676e-09	2.95676	1.93656e-07	193.656	7.45058	1.28004	0.806372	0.179712	1.85373	0.884448	0.20172	3.37803		-0.355199	0.384093	-0.166279	-0.478421	1.90567
PaPd99-bleached	PaAw51	Aiwakoko lagoonal area	2015-01-27	7.5986	134.508	protected	patch reef	back reef	inside	submerged	morning	28.6	34	64	10.9	10 — 15	P. acuta	yes	1	bleached	15	89	90	D w/residual A+C	0.739286	1.22889e-09	1.22889	0.0643876	99.9356	1907.35	0.136852	3.59839e-09	3.59839	2.12407e-07	212.407	5.91353	2.56009	3.88037	0.216195	6.91825	0.905127	0.0166355	3.0095		-0.121124	1.58959	-0.140264	0.16932	1.96886
PaPd100.1-2	PaAw52-day	Aiwakoko lagoonal area	2015-01-27	7.6254	134.561	protected	patch reef	lagoonal	inside	submerged	midday	29	34	284	10.5	10 — 15	P. acuta	yes	5	healthy	14	78	0	D w/residual A+C	2.68421	1.86265e-09	1.86265	0.0424893	99.9575	4381.94	5.64648	1.05367e-08	10.5367	1.07046e-06	1070.46
PaPd100.3 (night)	PaAw52-night	Aiwakoko lagoonal area	2015-01-27	7.6254	134.561	protected	patch reef	lagoonal	inside	submerged	night			0	10.5	10 — 15	P. acuta		5	healthy	14	78	0	A w/residual C	0.326471	4.80328e-09	4.80328	0.218751	99.7812	2190.97	0.222316	7.98533e-09	7.98533
PaPd101	PaAw52-day	Aiwakoko lagoonal area	2015-01-27	7.6254	134.561	protected	patch reef	lagoonal	inside	submerged	midday	29	34	32	9.4	5 — 10	P. acuta	yes	5	healthy	14	80	0	D w/residual A+C	1.10556	3.47582e-09	3.47582	0.137916	99.8621	2516.76	0.369596	1.4614e-09	1.4614	6.2919e-07	629.19	6.79286	1.68906	5.23996	0.0270443	1.542	0.485056	0.343441	7.07578		-0.0175952	0.769297	-0.275142	-0.518291	0.685197
PaPd102-day	PaAw52-day	Aiwakoko lagoonal area	2015-01-27	7.6254	134.561	protected	patch reef	lagoonal	inside	submerged	midday	29	34	229	9.1	5 — 10	P. acuta	yes	4	healthy	30	508	5	C w/residual A	1.51579	5.56131e-08	55.6131	1.76319	98.2368	3098.5	792.73	2.63418e-09	2.63418	1.6334e-11	0.016334	3.0966	1.01651	7.24489	0.420004	9.07444	0.702367	15.086	3.37986		0.135074	0.135921	0.00506585	0.445092	1.34926
PaPd102.3 (night)	PaAw52-night	Aiwakoko lagoonal area	2015-01-27	7.6254	134.561	protected	patch reef	lagoonal	inside	submerged	night			0	9.1	5 — 10	P. acuta		4	healthy	30	508	5	C w/residual A	0.202857	1.53705e-07	153.705	4.52241	95.4776	3245.04	1549.25	4.80328e-09	4.80328	3.09471e-12	0.00309471	13.2754	0.211415	0.133183	0.00723684	0.735218	0.00934333	0.532029	0.789031	0.0898031	-0.40646	-0.622287	-0.289267	-0.621476	-0.768492
PaPd103.1-2	PaAw52-day	Aiwakoko lagoonal area	2015-01-27	7.6254	134.561	protected	patch reef	lagoonal	inside	submerged	midday	29	34	55	10.1	10 — 15	P. acuta	yes	4	healthy	12	63	0	D w/residual A+C	1.14737	1.34787e-09	1.34787	0.072267	99.9277	1863.78	2.69575	6.26517e-09	6.26517	4.76837e-07	476.837
PaPd103.3 (night)	PaAw52-night	Aiwakoko lagoonal area	2015-01-27	7.6254	134.561	protected	patch reef	lagoonal	inside	submerged	night			0	10.1	10 — 15	P. acuta		4	healthy	12	63	0	D w/residual A+C	0.330935	2.82324e-09	2.82324	0.128692	99.8713	2190.97	0.0733371	6.95164e-09	6.95164	2.63579e-06	2635.79	8.17198	0.685975	0.473979	0.096366	8.72206	0.156355	0.0373694	2.07949		-0.38051	-0.175367	-0.225711	0.400023	-0.319252
PaPd104.1-2	PaAw52-day	Aiwakoko lagoonal area	2015-01-27	7.6254	134.561	protected	patch reef	lagoonal	inside	submerged	midday	29	34	257	10.7	10 — 15	P. acuta	yes	4	pale	21	195	0	D w/residual A+C	1.09254	6.58545e-10	0.658545	0.0614818	99.9385	1070.46	0.243842	1.7992e-09	1.7992	5.60545e-07	560.545	5.26836	0.570208	0.432137	0.0296402	0.320197	0.0620494	0.0592803	0.0962475	40.0491	-0.383696	-0.284392	-0.273291	-0.674557	-0.607432
PaPd104.3 (night)	PaAw52-night	Aiwakoko lagoonal area	2015-01-27	7.6254	134.561	protected	patch reef	lagoonal	inside	submerged	night			0	10.7	10 — 15	P. acuta		4	healthy	21	195	0	D w/residual A+C	0.469751	2.24081e-09	2.24081	0.072267	99.9277	3098.5	0.414857	7.05811e-10	0.705811	3.64243e-06	3642.43	1.20082	1.03971	3.45698		24.6558	0.359196	1.34151	5.74714	254.323	-0.153364	0.157763		2.43791	0.300593
PaPd105-day	PaAw52-day	Aiwakoko lagoonal area	2015-01-27	7.6254	134.561	protected	patch reef	lagoonal	inside	submerged	midday	29	34	46	9.1	5 — 10	P. acuta	yes	3	healthy	10	61	0	D w/residual A+C	0.678409	2.51522e-09	2.51522	0.0931594	99.9068	2697.4	0.643503	1.51294e-09	1.51294	1.69925e-06	1699.25	7.11412	0.544446	3.15184		7.41693	0.298581	0.242741	1.61275		-0.176599	-0.308653		0.2331	0.115364
PaPd105.3 (night)	PaAw52-night	Aiwakoko lagoonal area	2015-01-27	7.6254	134.561	protected	patch reef	lagoonal	inside	submerged	night			0	9.1	5 — 10	P. acuta		3	healthy	10	61	0	D w/residual A+C	0.538889	8.55847e-09	8.55847	0.288442	99.7116	2958.57	0.810763	1.22889e-09	1.22889	8.76387e-06	8763.87	1.62153	0.970153	1.08896		14.5234	0.29178	0.423464	2.03207	8.151	-0.333681	0.0922596		1.14201	0.0945805
PaPd106.2	PaVl54	Ngaruangl (Vellasco) reef		8.1677	134.608	intermediate	patch reef	fore reef	outside	emergent	morning	28.4	34.2				P. acuta		3	bleached			0	C w/residual A	0.559024	2.22452e-07	222.452	12.5559	87.4441	1549.25	5520.89	4.13347e-09	4.13347	2.8543e-12	0.0028543	2.29319	1.20396	1.91117	0.482871	4.04567	0.477792	1.49801	3.32754		-0.271072	0.31245	0.0498947	-0.198077	0.663001
PaPd107	PaNW60	Northwest Reef	2015-01-30	7.8708	134.504	intermediate	barrier reef	fore reef	outside	emergent	morning	27.9	34.3	42	25.5	25 — 30	P. acuta	yes	3	healthy	10	33	0	C w/ residual A+D	1.1875	6.84678e-08	68.4678	2.31352	97.6865	2891	1174.11	4.91555e-09	4.91555	1.76453e-10	0.176453	11.035	0.100874	0.010008	0.00172791	0.0166298	0.00445806	0.0035366	0.136216		-0.415839	-0.72639	-0.293195	-0.713382	-0.78342
PaPd108-healthy	PaNw60	Northwest Reef	2015-01-30	7.8708	134.504	intermediate	barrier reef	fore reef	outside	emergent	morning	27.9	34.3	28	24.9	20 — 25	P. acuta	yes	3	healthy			0	C w/residual A	0.568421	1.03778e-07	103.778	5.75573	94.2443	1699.25	690.112	7.62473e-09	7.62473	8.35788e-12	0.00835788
PaPd108-tumor	PaNw60	Northwest Reef	2015-01-30	7.8708	134.504	intermediate	barrier reef	fore reef	outside	emergent	morning	27.9	34.3	28	24.9	20 — 25	P. acuta		3	sick			100	C w/residual A	0.732	5.82433e-08	58.2433	1.84504	98.155	3098.5	1095.48	5.64648e-09	5.64648	1.71065e-11	0.0171065	0.138442	0.604439	8.81729	1.35005	6.49657	1.32593	15.2741	7.6759		0.254807	-0.252154	0.668254	0.115388	3.25474
PaPd109	PaNw61	Northwest Reef	2015-01-30	7.8905	134.587	protected	patch reef	lagoonal	inside	submerged	midday	29	34.3	69	24.1	20 — 25	P. acuta	some	5	healthy	6	18	0	C w/residual A	1.78	8.42937e-08	84.2937	4.32702	95.673	1863.78	2891	3.13258e-09	3.13258	5.7086e-12	0.0057086	23.1139	0.004676	0.0450027	0.000456624	0.00286608	0.0112507	0.000623766	0.0460546		-0.413175	-0.816985	-0.294101	-0.715142	-0.762663
PaPd110	PaNw61	Northwest Reef	2015-01-30	7.8905	134.587	protected	patch reef	lagoonal	inside	submerged	midday	29	34.3	97	20.6	20 — 25	P. acuta	yes	5	bleached	13	49	80	C w/residual A	1.35556	1.36936e-07	136.936	4.32702	95.673	3027.73	3098.5	2.69575e-09	2.69575	3.5831e-11	0.035831	11.8271	0.671226	19.1358	0.0938582	0.968144	0.545205	5.73566	3.46184		1.04053	-0.189257	-0.227499	-0.591685	0.869001
PaPd111	PaNw62	Northwest Reef	2015-01-30	7.9654	134.577	intermediate	back reef	back reef	inside	emergent	afternoon	29	31.6	60	24.3	20 — 25	P. acuta	yes	5	healthy	15	50	0	C w/ residual A+D	2.51538	3.45056e-07	345.056	7.14488	92.8551	4484.36	18785.8	3.85666e-09	3.85666	7.39191e-10	0.739191	1.37938	1.47268	33.3229	2.45619	7.98019	0.971604	21.5521	2.44829		2.12083	0.565514	1.45701	0.30514	2.172
PaPd112	PaNw62	Northwest Reef	2015-01-30	7.9654	134.577	intermediate	back reef	back reef	inside	emergent	afternoon	29	31.6	19	20.7	20 — 25	P. acuta	yes	5	healthy	17	122	0	C w/ residual A+D	3.12581	1.50194e-07	150.194	6.27804	93.722	2242.18	3559.24	6.63771e-09	6.63771	6.6863e-11	0.066863
PaPd113	PaNw62	Northwest Reef	2015-01-30	7.9654	134.577	intermediate	back reef	back reef	inside	emergent	afternoon	29	31.6	46	20.2	20 — 25	P. acuta	yes	1	bleached	21	122	80	C w/residual A	2.325	8.42937e-08	84.2937	3.24075	96.7593	2516.76	4484.36	1.7992e-09	1.7992	7.53254e-12	0.00753254	11.5569	0.37666	12.3348	0.0432948	0.467706	0.142727	1.51958	1.69114	1.82809	0.522657	-0.466667	-0.263555	-0.65569	-0.360895
PaPd114	PaNw65	Northwest Reef, northern passage	2015-01-31	7.9539	134.627	intermediate	back reef	back reef	inside	emergent	afternoon	29.1	34.2	42	20.8	20 — 25	P. acuta	yes	2	pale	13	67	0	D w/residual A+C	1.39	5.3915e-09	5.3915	0.173701	99.8263	3098.5	0.300205	1.8201e-09	1.8201	6.00777e-07	600.777	11.8271	0.327498	2.80803	0.00138937	4.46497	0.393988	0.0650933	3.30097	13.2261	-0.202779	-0.512965	-0.293436	-0.144448	0.406911
PaPd115	PaNw65	Northwest Reef, northern passage	2015-01-31	7.9539	134.627	intermediate	back reef	back reef	inside	emergent	afternoon	29.1	34.2	28	14.5	10 — 15	P. acuta	some	5	pale	4	9	0	C+D w/residual A	1.34615	3.69822e-07	369.822	12.3044	87.6956	2635.79	9178.35	5.14803e-09	5.14803	2.24218e-06	2242.18
PaPd116	PaAw69		2015-02-02	7.7746	134.588	protected	patch reef	lagoonal	inside	submerged	morning	28.8	34.2	14			P. acuta	yes	4	pale	12	75		D w/residual A+C	0.291892	3.16898e-09	3.16898	0.15478	99.8452	2044.25	0.849108	9.60656e-09	9.60656	6.00777e-07	600.777
PaPd117	PaAw69		2015-02-02	7.7746	134.588	protected	patch reef	lagoonal	inside	submerged	morning	28.8	34.2	14			P. acuta	yes	2	pale	9	29	0	D w/residual A+C	0.890909	1.77853e-09	1.77853	0.0547777	99.9452	3245.04	0.111158	6.33796e-09	6.33796	2.93528e-07	293.528	4.69357	0.179597	0.36759	0.597468	0.496638	0.0540149	0.0800438	0.13929	89.9011	-0.388611	-0.652252	0.131611	-0.65199	-0.631984
PaPd118	PaAw69		2015-02-02	7.7746	134.588	protected	patch reef	lagoonal	inside	submerged	morning	28.8	34.2	19			P. acuta	yes	5	healthy	29	407	0	C w/residual A	2.08	1.16487e-07	116.487	3.38882	96.6112	3320.89	1070.46	4.91555e-09	4.91555			15.2495	0.19268	9.56401	0.0232367	0.693779	0.0566263	4.20629	1.37327	1.59389	0.311667	-0.639931	-0.277858	-0.626776	-0.624004
PaPd119	PaAw69		2015-02-02	7.7746	134.588	protected	patch reef	lagoonal	inside	submerged	midday	28.8	34.2	14			P. acuta	yes	1	bleached	10	55	0	C w/residual A	0.236719	1.50194e-07	150.194	4.23237	95.7676	3398.51	3398.51	3.24305e-09	3.24305	1.26682e-11	0.0126682	29.1216	0.000496681	0.0325306	0.00023613	0.000767188	0.00345909	0.00197838	0.00691817	0.112802	-0.414124	-0.820921	-0.294259	-0.715411	-0.786473
PaPd124	PaAw72		2015-02-03	7.6572	134.58	protected	patch reef	lagoonal	inside	submerged	afternoon	28.8	34.2	14	14.5	10 — 15	P. acuta	yes	2	bleached	15	96	50	D w/residual A+C	0.77346	2.95676e-09	2.95676	0.097561	99.9024	3027.73	0.113756	4.43014e-09	4.43014	8.11259e-07	811.259	12.9722	0.359199	0.611118	0.0224712	3.30401	0.0390877	0.0138326	2.03194		-0.370067	-0.48311	-0.278403	-0.292933	-0.677599
PaPd125-day	PaAw74-day		2015-02-04	7.6327	134.595	protected	patch reef	lagoonal	inside	submerged	midday	28.6	34.2	106	9.1	5 — 10	P. acuta	yes	5	healthy	17	183	0	D w/residual A+C	0.229646	6.63771e-09	6.63771	0.208893	99.7911	3170.92	0.286648	1.03337e-09	1.03337	1.3487e-06	1348.7	11.035	0.625424	0.844541		2.56536	0.29859	0.0516828	4.25622		-0.352292	-0.232392		-0.387405	0.115392
PaPd125.2 (night)	PaAw74-night		2015-02-04	7.6327	134.595	protected	patch reef	lagoonal	inside	submerged	night			0	9.1	5 — 10	P. acuta		5	healthy	17	183	0	D w/residual A+C	0.914613	4.69357e-09	4.69357	0.137916	99.8621	3398.51	0.261344	3.72529e-09	3.72529	1.77962e-06	1779.62	10.783	0.640026	1.68904		7.08517	0.350998	0.24285	3.37808		-0.287987	-0.21864		0.190668	0.275541
PaPd126.1 (day)	PaAw74-day		2015-02-04	7.6327	134.595	protected	patch reef	lagoonal	inside	submerged	midday	28.6	34.2	92	9.3	5 — 10	P. acuta	yes	5	healthy	30	435	0	D w/residual A+C	0.56625	3.72529e-09	3.72529	0.122888	99.8771	3027.73	0.573296	3.47582e-09	3.47582	3.55924e-06	3559.24	2.45778	1.06403	3.70516		25.8349	0.312704	2.50461	2.07945	92.0652	-0.134465	0.180667		2.58872	0.158521
PaPd126.2 (night)	PaAw74-night		2015-02-04	7.6327	134.595	protected	patch reef	lagoonal	inside	submerged	night			0	9.3	5 — 10	P. acuta		5	healthy	30	435	0	D w/residual A+C	1.55376	6.95164e-09	6.95164	0.257054	99.7429	2697.4	0.792246	2.45778e-09	2.45778	2.24218e-06	2242.18	7.98533	0.583558	1.28012		5.01595	0.376211	0.103415	2.68133		-0.319124	-0.271819		-0.0739795	0.352588
PaPd127-day	PaAw74-day		2015-02-04	7.6327	134.595	protected	patch reef	lagoonal	inside	submerged	night	28.6	34.2	0	10.8	10 — 15	P. acuta		5	fluorescent	14	98	0	D w/residual A+C	1.52414	7.62473e-09	7.62473	0.229073	99.7709	3320.89	0.586696	4.27923e-09	4.27923	7.28486e-06	7284.86
PaPd127.2 (night)	PaAw74-night		2015-02-04	7.6327	134.595	protected	patch reef	lagoonal	inside	submerged	night			0	9.7	5 — 10	P. acuta		5	fluorescent	18	209	0	D w/residual A+C	1.68966	4.91555e-09	4.91555	0.16587	99.8341	2958.57	0.157201	7.56469e-10	0.756469	6.90112e-07	690.112	1.95074	1.01599	2.71238		12.3394	0.611133	1.73132	5.88167		-0.210063	0.13543		0.862679	1.07046
PaPd128.1 (day)	PaAw74-day		2015-02-04	7.6327	134.595	protected	patch reef	lagoonal	inside	submerged	midday	28.6	34.2	32	11.5	10 — 15	P. acuta	yes	4	healthy	18	148	0	D w/residual A+C	1.9814	7.11412e-09	7.11412	0.363142	99.6369	1951.93	0.300205	3.85666e-09	3.85666	8.36811e-06	8368.11	7.28041	0.992917	0.532091		7.43703	0.152803	0.00563276	4.45805	212.02	-0.376085	0.113698		0.23567	-0.330106
PaPd128.2 (night)	PaAw74-night		2015-02-04	7.6327	134.595	protected	patch reef	lagoonal	inside	submerged	night			0	11.5	10 — 15	P. acuta		4	healthy	18	148	0	D w/residual A+C	1.67273	5.14803e-09	5.14803	0.208893	99.7911	2459.28	0.172422	6.71484e-09	6.71484	3.24504e-06	3245.04	7.98533	1.25087	2.50174	0.00342225	8.52969	0.216074	0.00872373	3.62069	12.9286	-0.226102	0.356627	-0.291987	0.37542	-0.136761
PaPd130.1 (day)	PaAw74-day		2015-02-04	7.6327	134.595	protected	patch reef	lagoonal	inside	submerged	midday	28.6	34.2	51	10.8	10 — 15	P. acuta	yes	5	healthy	14	98	0	D w/residual A+C	1.11461	4.48162e-09	4.48162	0.229073	99.7709	1951.93	0.101345	4.27923e-09	4.27923	5.64994e-06	5649.94	5.14803	1.31007	1.31007	0.00354365	16.6731	0.35923	0.0129233	4.45774		-0.316844	0.412381	-0.2919	1.41695	0.300696
PaPd130.2 (night)	PaAw74-night		2015-02-04	7.6327	134.595	protected	patch reef	lagoonal	inside	submerged	night			0	10.8	10 — 15	P. acuta		5	healthy	14	98	0	D w/residual A+C	1.52414	5.51752e-09	5.51752	0.190488	99.8095	2891	0.756469	6.48611e-09	6.48611	4.69644e-06	4696.44
PaPd131.1 (day)	PaAw74-day		2015-02-04	7.6327	134.595	protected	patch reef	lagoonal	inside	submerged	midday	28.6	34.2	60	8.3	5 — 10	P. acuta	yes	4	pale	14	92	0	D w/residual A+C	0.817925	6.1932e-09	6.1932	0.630571	99.3694	975.965	0.0555791	2.13962e-09	2.13962	2.34822e-06	2348.22	6.79286	0.532336	0.312893		0.644061	0.171595	0.00162194	4.16142	9.83962	-0.392776	-0.320058		-0.633135	-0.272683
PaPd131.2 (night)	PaAw74-night		2015-02-04	7.6327	134.595	protected	patch reef	lagoonal	inside	submerged	night			0	8.3	5 — 10	P. acuta		4	pale	14	92	0	D w/residual A+C	0.385916	5.3915e-09	5.3915	0.245474	99.7545	2190.97	0.414857	3.02588e-09	3.02588	2.09203e-06	2092.03	12.1035	0.42229	0.702047		2.39444	0.110565	0.180036	3.37832		-0.363143	-0.423694		-0.409265	-0.459176
PaPd132.1 (day)	PaAw74-day		2015-02-04	7.6327	134.595	protected	patch reef	lagoonal	inside	submerged	midday	28.6	34.2	51	10.5	10 — 15	P. acuta	yes	5	healthy	9	49	0	C w/ residual A+D	0.53245	2.17372e-07	217.372	19.6329	80.3671	889.81	2697.4	3.72529e-09	3.72529	1.06138e-10	0.106138	4.91555	1.08746	1.93763	0.0433287	1.96083	0.734226	0.294866	7.40053	0.743017	-0.269057	0.202734	-0.263531	-0.464723	1.44661
PaPd132.2 (night)	PaAw74-night		2015-02-04	7.6327	134.595	protected	patch reef	lagoonal	inside	submerged	night			0	10.5	10 — 15	P. acuta		5	healthy	9	49	0	D w/residual A+C	1.788	4.27923e-09	4.27923	0.181902	99.8181	2348.22	0.336969	4.43014e-09	4.43014	1.77962e-06	1779.62
PaPd134.1 (day)	PaAw74-day		2015-02-04	7.6327	134.595	protected	patch reef	lagoonal	inside	submerged	midday	28.6	34.2	64	9.9	5 — 10	P. acuta	yes	5	healthy	15	102	0	D w/residual A+C	1.06098	2.34679e-09	2.34679	0.112052	99.8879	2092.03	0.0945586	5.14803e-09	5.14803	1.25838e-06	1258.38
PaPd134.2 (night)	PaAw74-night		2015-02-04	7.6327	134.595	protected	patch reef	lagoonal	inside	submerged	night			0	9.9	5 — 10	P. acuta		5	healthy	15	102	0	D w/residual A+C	1.09558	3.99267e-09	3.99267	0.10217	99.8978	3903.86	0.329272	6.33796e-09	6.33796	1.73897e-06	1738.97	12.6759	0.45256	1.03971	0.00397256	6.16579	0.0897993	0.00353915	2.74381	26.4333	-0.337431	-0.395187	-0.291594	0.0730819	-0.522634
PaPd136	Pa76		2015-02-05	7.82929	134.52	intermediate	fringing reef	fore reef	outside	submerged	morning	27.1	34.4	138	11.7	10 — 15	P. acuta	some	5	healthy	11	53	0	D w/residual A+C	1.51304	4.58637e-09	4.58637	0.15125	99.8488	3027.73	0.560202	5.14803e-09	5.14803	2.04425e-06	2044.25	8.75851	0.327496	0.248196	0.0150058	1.28194	0.0229751	0.0121885	1.76894	7.59471	-0.397702	-0.512967	-0.283727	-0.551552	-0.726836
PaPd138	Pa77		2015-02-05	7.76055	134.568	intermediate	fringing reef	fore reef	outside	submerged	midday	26.8	34.5	37	20.2	20 — 25	P. acuta	yes	4	bleached	13	101	10	C w/residual A	0.338571	1.72528e-07	172.528	7.78284	92.2172	2044.25	5033.52	6.26517e-09	6.26517	2.57244e-12	0.00257244
PaPd147	Pa84		2015-02-08	7.5074	134.445	protected	patch reef	lagoonal	inside	submerged	midday	27.7	34.2	46	10.3	10 — 15	P. acuta	yes	4	sick	17	132	5	D w/residual A+C	0.308021	3.31886e-09	3.31886	0.275453	99.7245	1201.55	0.116415	4.13347e-09	4.13347	1.73897e-06	1738.97	8.96323	0.655109	0.655109	0.00549927	1.85762	0.201634	0.0148519	2.07984		-0.366717	-0.204435	-0.290506	-0.477923	-0.180889
[truncated: 39 more columns]
